## **E-cadherin-dependent phosphorylation of EGFR governs a homeostatic feedback loop controlling intercellular junction viscosity and collective migration modes.**

Chaoyu Fu<sup>1</sup>, Florian Dilasser<sup>1\*</sup>, Shao-Zhen Lin<sup>2\*</sup>, Marc Karnat<sup>2\*</sup>, Aditya Arora<sup>1</sup>, Harini Rajendiran<sup>1</sup>, Hui Ting Ong<sup>1</sup>, Nai Mui Hoon Brenda<sup>3</sup>, Sound Wai Phow<sup>1</sup>, Tsuyoshi Hirashima<sup>1</sup>, Michael Sheetz<sup>1</sup>, Jean-François Rupprecht<sup>2\*</sup>, Sham Tlili<sup>3\*</sup>, Virgile Viasnoff<sup>1,4</sup>

### **Affiliations:**

<sup>1</sup> Mechanobiology Institute, National University of Singapore, 5a engineering drive 1 117411 Singapore.

<sup>2</sup> Aix Marseille Univ, Université de Toulon, CNRS, CPT (UMR 7332), Turing Centre for Living systems, Marseille, France.

<sup>3</sup> Department of Biomedical Engineering, National University of Singapore, 4 Engineering Drive 3, 117583, Singapore.

<sup>4</sup> Aix Marseille Univ, IBDM (UMR 7288), Turing Centre for Living systems, Marseille, France.

<sup>5</sup> CNRS IRL 3639, 5a Engineering drive 1, 117411 Singapore.

\* Equally contributed

Corresponding author: [virgile.viasnoff@cnr.fr](mailto:virgile.viasnoff@cnr.fr)

1 **Abstract:**

2

3 Actomyosin tension has been shown to be a ubiquitous driver of tissue morphogenesis<sup>1, 2</sup>.  
4 The Rho pathway, a prominent regulatory network influencing cortical tension, plays a central  
5 role in both tissue reorganisation and cell migration<sup>3-6</sup>. While viscous dissipation in the actin  
6 network is commonly regarded as a constant passive parameter in cell migration in both 2D  
7 and 3D contexts, there is limited knowledge concerning the regulation of dissipative forces  
8 arising from viscous drag between cells during collective rearrangement. Here, we found that  
9 the phosphorylation of Epithelial Growth Factor Receptor (EGFR) downstream of *de novo* E-  
10 cadherin adhesion<sup>7, 8</sup> orchestrates a feedback loop, thereby governing intercellular viscosity  
11 via the Rac pathway regulating actin dynamics. Our findings highlight how the E-cadherin-  
12 dependent EGFR activity controls the migration mode of collective cell movements  
13 independently of intercellular tension. Combining molecular cell biology, micropatterning,  
14 and *in silico* simulation, our work suggests the existence of a regulatory loop by which cells  
15 can tune junctional actin viscosity, with implications for the phenomenology of  
16 morphogenetic movements.

17

18 **Main.**

19

20 We postulated the existence of a feedback loop between cell junction elongation and E-  
21 cadherin-dependent phosphorylation of EGFR at junctions. This hypothesis was tested on  
22 Madin-Darby Canine Kidney (MDCK) cells with 2D migration in a culture dish. All experiments  
23 were conducted using both serum-free and serum-rich media, with consistently similar  
24 phenotypes observed, albeit more pronounced effects in serum-free conditions. All  
25 presented results pertain to serum-free conditions (**Methods**).

26

27 We first compared the migration of MDCK cells under control conditions and following  
28 selective inhibition of EGFR phosphorylation using Erlotinib at 1 $\mu$ M. Quantification of cell  
29 movement on 2D or 1D line patterns (**Extended Data Fig. 1a, c**) demonstrated that the  
30 migration of single isolated cells remained insensitive to EGFR inhibition. Consequently, we  
31 ruled out the possibility that EGFR inhibition directly altered cell-substrate interactions as well  
32 as their single cell migration potential. In contrast, EGFR inhibition significantly impacted  
33 collective cell migration on 2D sparse islets and 1D line patterns (**Fig. 1a, Extended Data Fig.**  
34 **1b, d, and Supplementary Video 1**). In the former case, EGFR inhibition markedly reduced  
35 the cellular swirling motion of cells by inhibiting EGFR phosphorylation. The velocity at which  
36 each contact changes length during migration (**Methods**), exhibited a 2-fold decrease upon  
37 inhibition (**Fig. 1b**). Thus, EGFR dephosphorylation reduced the dynamics of cell junction  
38 deformation.

39

40 Reciprocally, we impeded the physical deformation of contacts during migration by  
41 supplementing the medium with 50  $\mu$ g/mL of dextran (5, 50 and 270 kDa) to increase the  
42 medium viscosity. We carefully ensured that the addition of dextran induced minimal osmotic  
43 shock (**Extended Data Fig. 2a**). In media with higher viscosity (270kDa dextran), the migration  
44 speed of individual isolated cells decreased by 28 % (**Extended Data Fig. 2b**). Within cohesive  
45 patches consisting of 20 to 50 cells, both collective migration and contact deformation ceased  
46 within 10 minutes of adding 50  $\mu$ g/mL dextran (**Fig. 1c, Extended Data Fig. 2c and**  
47 **Supplementary Video 2**). The individual cell velocity within the patch decreased from  $13.7 \pm$

48 0.13  $\mu\text{m}/\text{h}$  (N=1735 cells) in the control group to  $8.2 \pm 0.06 \mu\text{m}/\text{h}$  (N=1925) for 270kDa  
49 dextran. Immunostaining revealed a significant reduction in the phosphorylation of EGFR at  
50 the apical junction (**Extended Data Fig. 2d**). Western blots confirmed a 75% reduction in the  
51 phosphorylation of the Src-dependent site Y845 pEGFR<sup>9</sup>, while the other phosphorylation  
52 sites (Y1068, Y1173) remained inactive under serum-free conditions (**Fig. 1d**). Our data  
53 strongly suggest that the physical arrest of cell junction deformation directly or indirectly  
54 leads to the dephosphorylation of apical pEGFR at its Src-dependent site.

55  
56 We subsequently investigated whether enhancing pEGFR would favour the dynamics of  
57 contact deformation. To do so, we transfected MDCK cells with EGFR coupled to the RUSH  
58 system (**Methods**). The RUSH-EGFR construct was sequestered on the ER membrane until  
59 released by biotin addition in the culture medium<sup>10</sup>. We established a high-confluence, non-  
60 polarised (95%) MDCK monolayer, resulting in a mosaic expression of RUSH-EGFR, with small  
61 patches of positive cells amid non-expressing control MDCK cells (**Fig. 1e**). Prior to the  
62 addition of biotin, the cells displayed limited junctional localization and weak recruitment of  
63 apical EGFR (**Supplementary Video 3**). Upon the addition of biotin, the RUSH-positive cells  
64 showed a substantial recruitment of EGFR at the cell contacts, leading to a 5-fold increase  
65 (from  $2.6 \pm 0.5$  to  $14.3 \pm 1.2 \mu\text{m}/\text{h}$ ) in their junction elongation velocity, quantified using  
66 Cellpose neural network segmentation of the cell contours (**Fig. 1e, f and Methods**). In RUSH-  
67 positive cells, EGFR localized exclusively to cell-cell contacts within minutes (**Extended Data**  
68 **Fig. 3a**). To validate these findings, we repeated the experiment in the presence of Erlotinib  
69 ( $1\mu\text{M}$ ). Despite the relocalization of EGFR to the junctions (**Extended Data Fig. 3b and**  
70 **Supplementary Video3**), the junction elongation velocity remained as low as the control, with  
71 very limited cellular rearrangements. These results strongly suggest that the burst increase in  
72 pEGFR at cell-cell contacts favours the dynamics of contact deformation.

73  
74 Conversely, we induced the physical elongation of cell junctions by embedding obstacles  
75 (non-adhesive disks with a diameter of  $200\mu\text{m}$ , **Methods**) into high confluence monolayers  
76 (**Fig. 1g**). Only the limited number of cell layers that spontaneously elongated and encircled  
77 the obstacles displayed deforming junctions (**Fig. 1g and Supplementary Video 4**) and  
78 elevated levels of apical pEGFR (**Fig. 1g**), in sharp contrast to the immobile bulk cells (**Fig. 1h**).  
79 A treatment with Erlotinib inhibited the elongation and circumrotation of the cells around the  
80 obstacle (**Supplementary Video 4**). Taken together, our findings support the hypothesis of a  
81 positive feedback loop (**Fig. 1i**) between apical EGFR phosphorylation and junction elongation.  
82 We subsequently delved into the molecular mechanisms underlying this phenomenon.

83  
84 The absence of the soluble ligand EGF and the specific phosphorylation of Y845 suggested an  
85 E-cadherin (Ecad)-dependent activation of EGFR<sup>7, 8, 11</sup>. Confluent patches of WT-MDCK cells  
86 displayed a two-fold decrease in apical pEGFR compared to sub-confluent patches ( $27.6 \pm$   
87  $11.1$  A.U. vs  $51.6 \pm 19.0$  A.U.) (**Fig. 2a**). In contrast, Ecad-KO tissues showed consistently low  
88 levels of apical pEGFR in both confluent and sub-confluent cases ( $4.0 \pm 2.3$  A.U. vs  $6.1 \pm 3.2$   
89 A.U.), while still forming cohesive patches (likely due to K-cadherins, quantified in (**Extended**  
90 **Data Fig. 4c**) with a proper junctional actin structure. In Ecad-KO MDCK cells with rescued  
91 expression of Ecad (Ecad-Res), the pEGFR levels in confluent and sub-confluent tissues  
92 returned to their control values ( $22.2 \pm 4.0$  A.U. vs  $30.2 \pm 7.9$  A.U.). Furthermore, when EGFR  
93 was inhibited by adding Erlotinib ( $1 \mu\text{M}$ ), the apical pEGFR for both confluent and sub-

94 confluent patches in WT-MDCK, Ecad-KO MDCK, and Ecad-Res MDCK all dropped to low levels  
95 (**Extended Data Fig. 4a, b**).

96  
97 We further validated the direct phosphorylation of EGFR at adherens junctions. We used Total  
98 Internal Reflection Fluorescence (TIRF) microscopy to image the live recruitment of cytosolic  
99 SH2-Grb2 to the membrane as a proxy for EGFR phosphorylation<sup>12</sup>. MDCK cells stably  
100 expressing tdEOS-labelled SH2-Grb2 were left to spread on E-Cad coated circular patterns  
101 (25µm diameter) (**Fig. 2b and Methods**). SH2-Grb2 dynamically accumulated in elongated  
102 structures that dynamically followed the progression of cell edges with a time delay  $\Delta t$ . A  
103 parallel experiment using E-cad-GFP MDCK cells revealed a similar accumulation of E-cad in  
104 structures with similar time delay  $\Delta t$  ( $1.3 \pm 0.2$  min for E-cad-GFP,  $1.5 \pm 0.2$  min for SH2-Grb2)  
105 (**Fig. 2b**). Our findings imply that the engagement of E-cad during junction elongation results  
106 in transient phosphorylation of EGFR. Consequently, the arrest of cell junction elongation  
107 leads to the dephosphorylation of pEGFR, whereas its physical induction promotes EGFR  
108 phosphorylation.

109  
110 We then scrutinized the alteration of recruitment of actin regulators in the same conditions  
111 as above. EGFR phosphorylation is a major regulator of Erk, a kinase extensively implicated in  
112 collective cell migration mechanisms<sup>13</sup>. Monitoring Erk activity using Fluorescence Resonance  
113 Energy Transfer (FRET) did not reveal any changes following the addition of 50µg/mL dextran  
114 to migrating cells (**Extended Data Fig. 5a**). This suggests that Erk signaling is not downstream  
115 of EGFR in our experimental context. To further dissect the molecular events, we performed  
116 pulldown assays to gauge the activity of Rho family GTPases, which are key regulators of actin  
117 dynamics<sup>14</sup>. The introduction of dextran to migrating cells resulted in a 28.9% reduction in  
118 Rac1 activity, with no discernible effects on Cdc42 and RhoA (**Fig. 2c**). However, the broad  
119 nature of pulldown assays made it challenging to distinguish whether Rac1 activity was  
120 junctional or lamellipodial. Notably, Wave2, a downstream target of Rac1, was present at the  
121 apical side of the junction<sup>15</sup> (**Extended Data Fig. 5b**). Surprisingly, the recruitment of Wave2  
122 and Arp2/3, two factors promoting branched actin nucleation, was higher in confluent  
123 monolayers ( $58.0 \pm 24.0$  A.U. and  $91.1 \pm 18.8$  A.U., respectively) than in sub-confluent patches  
124 ( $43.9 \pm 22.9$  A.U. and  $63.9 \pm 11.9$  A.U., respectively), a difference that is substantially reduced  
125 upon treatment with Erlotinib (1µM) (**Fig. 2d, e and Extended Data Fig. 5b, c**). The amount of  
126 phosphorylated Myosin light chain (pMLC) remained unaffected by pEGFR both in confluent  
127 and sub-confluent culture conditions (**Fig. 2f and Extended Data Fig. 5d**). Our data advocate  
128 for a model wherein the trans binding of new E-cadherin in elongating junctions, increasing  
129 the junctional level of pEGFR, subsequently activating Rac1, decreasing levels of Wave2 and  
130 Arp2/3 with a constant myosin level, thereby establishing a balance between branched and  
131 linear junctional actin. **Fig. 2g** illustrates this feedback homeostatic loop.

132  
133 Next, we evaluated the impact of EGFR phosphorylation on the turnover rate of junction actin  
134 using Fluorescence Recovery After Photobleaching (FRAP). We compared junctions in  
135 confluent monolayers, cells surrounding obstacles, and sub-confluent patches with or without  
136 EGFR inhibition (**Fig. 2h and Extended Data Fig. 6a-c**). In all cases, we observed a deceleration  
137 in actin turnover when pEGFR levels were lower. Additionally, we probed junctional tension  
138 by assessing fast actin recoil following laser ablation (**Fig. 2i**). We did not detect any  
139 substantial difference, proving that pEGFR does not regulate tension in this specific context.  
140 Finally, we probed the viscoelastic properties of junctions using Atomic Force Microscopy

141 (AFM), revealing an increase in the loss modulus upon EGFR inhibition, with no changes in the  
142 elastic modulus (**Extended Data Fig. 6d-f**).

143

144 We previously reported that E-cad-dependent phosphorylation of EGFR in suspended cell  
145 doublets increases the velocity of *de-novo* junction formation<sup>8</sup> and the toughness of their  
146 adhesion<sup>16</sup>. In all cases, the microscopic dynamics of the actin cortex are associated with a  
147 change in cell deformability, with minimal impact on cortical tension. This implies that the  
148 homeostasis of junction viscosity is regulated by the Ecad-dependent EGFR phosphorylation  
149 loop, effectively “self-lubricating” junction elongation.

150

151 By analogy with the transition from laminar to turbulent flows of fluids at various Reynolds  
152 numbers, we monitored how the inhibition of EGFR alters patterns of collective MDCK  
153 migration along fibronectin strips (width, 400  $\mu\text{m}$ ; length, 3000  $\mu\text{m}$ ) (**Methods**). **Fig. 3a** and  
154 **Supplementary Video 5** show the leading region (0-500  $\mu\text{m}$  from the front) of migrating cells  
155 in ctrl and Erlotinib conditions over 12 hours. Although migration fronts collectively  
156 progressed at similar velocities in both conditions, inhibition of pEGFR abolished the vortices  
157 observed in the ctrl case, leading to more laminar flows with enhanced cellular elongation in  
158 the direction of migration. We subsequently quantified these qualitative observations. The  
159 high level of apical pEGFR in Ctrl was significantly reduced in the inhibitory case (**Fig. 3b**). In  
160 the bulk regions (3 mm away from the front), the level of apical pEGFR remained constant in  
161 both conditions. We computed the cellular flow lines in the monolayer (**Methods**) to  
162 established maps of cell velocities and flow vorticity (**Fig. 3c, d**). Additionally, we used CellPose  
163 to segment individual cells (**Methods**) and to quantify the individual level of strain on each  
164 cell. pEGFR inhibition resulted in around a 3-fold increase in cellular strain ( $0.06 \pm 0.04$  in Ctrl,  
165  $0.14 \pm 0.06$  in Erlotinib;  $n=1060$  cells) (**Fig. 3e**). While the collective velocity of the migration  
166 fronts was not affected by pEGFR inhibition ( $15.0 \pm 4.7$   $\mu\text{m}/\text{h}$  in Ctrl,  $14.8 \pm 2.9$   $\mu\text{m}/\text{h}$  in  
167 Erlotinib;  $N=16$  strips), it substantially reduced the individual cell velocity within the  
168 monolayer (from  $18.7 \pm 2.0$   $\mu\text{m}/\text{h}$  to  $12.6 \pm 2.0$   $\mu\text{m}/\text{h}$ ;  $n=182$  cells) (**Fig. 3g**). Likewise, the  
169 vorticity of the collective flow (**Fig. 3h**) was reduced by 2-fold ( $0.70 \pm 0.10$   $\text{h}^{-1}$  to  $0.33 \pm 0.05$   $\text{h}^{-1}$ ;  
170  $n=182$  cells), and the correlation length of the cell velocity increased by 2-folds  
171 (**Supplementary Fig. 4**).

172

173 To further substantiate the hypothesis regarding a change in intercellular viscosity, we  
174 inferred the average shape relaxation time  $t_{\text{visc}}$  of cells within the monolayer. This parameter  
175 proved to be a reliable indicator of cellular viscoelasticity in migrating monolayers<sup>17</sup>. **Fig. 3i, j**  
176 illustrates the analysis procedure. Initially, we segmented phase-contrast images of the  
177 monolayer at a specific time point. Subsequently, we computed the average initial cell strain  
178 on a coarse-grained grid (**Methods**) and used an optic flow method to estimate the flow lines  
179 (**Methods**). The evolution of local cellular strain was then evaluated using the approach  
180 depicted in **Fig. 3i** and elaborated on in the **Supplementary Information**. The only free  
181 parameter in this equation is the intrinsic strain relaxation time  $t_{\text{visc}}$ , which does not depend  
182 on the shear level experienced by the cells. By utilizing the strain map at  $t = 0$  and solving the  
183 equation along the flow lines, we inferred the final strain map at a later time point (10 h). We  
184 varied  $t_{\text{visc}}$  to maximise the correlation between the observed and measured strain maps. The  
185 best fits lead to  $t_{\text{visc}} = 75 \pm 15$  min ( $R^2=0.4\pm 0.04$ ;  $N=3$ ) for the control group and  $t_{\text{visc}} = 210 \pm 65$   
186 min ( $R^2=0.34\pm 0.2$ ;  $N=3$ ) for the pEGFR inhibition group (**Fig. 3k, l**). In the control conditions,  
187 cells exhibited shape relaxation when advected in swirling vortices, while under pEGFR

188 inhibitory conditions, they elongated more in directed laminar, plug-like flows  
 189 (**Supplementary Video 6**). As pEGFR inhibition did not affect the single-cell migration  
 190 (**Extended Data Fig. 1a, c**), the approximately 3-fold increase in cell shape relaxation times  
 191 supports the hypothesis that the level of pEGFR controls viscous dissipation in cell-cell  
 192 junction elongation.

193

194 Finally, we designed a vertex model with viscosity (**Supplementary Information**) to  
 195 demonstrate that a modulation of intercellular viscosity can account quantitatively for our  
 196 observations. In our model, the force balance at each tri-cellular junction is expressed as  
 197 follows:

198

$$199 \quad \underbrace{\mathbf{F}_i^{(\text{elastic})}}_{\text{elasticity}} + \underbrace{\mathbf{F}_i^{(\text{active})}}_{\text{activity}} + \underbrace{\mathbf{F}_i^{(\text{friction})}}_{\text{friction}} + \underbrace{\mathbf{F}_i^{(\text{viscous})}}_{\text{viscosity}} = \mathbf{0}$$

200 The first 3 terms are standard for vertex models<sup>18, 19</sup> and correspond to:  $\mathbf{F}_i^{(\text{elastic})}$ : the elastic  
 201 forces accounting for the mechanical regulation of the cell shape<sup>20-23</sup>, that are assumed to  
 202 derive from a mechanical energy  $E$ :

$$203 \quad E = \underbrace{\sum_J \frac{1}{2} K_A (A_J - A_0)^2}_{\text{area elasticity}} + \underbrace{\sum_J \frac{1}{2} K_P (P_J - P_0)^2}_{\text{perimeter elasticity}},$$

204 where the two terms account for the cell area elasticity and the cell perimeter elasticity,  
 205 respectively. In detail,  $K_A$  and  $K_P$  are the area stiffness and perimeter stiffness of cells,  
 206 respectively;  $A_J$  and  $P_J$  are the area and the perimeter of the  $J$ -th cell, respectively;  $A_0$  and  $P_0$   
 207 are the preferred area and preferred perimeter, respectively.

208  $\mathbf{F}_i^{(\text{active})}$  corresponding to the active fluctuations of the cortical tension, assumed to be a  
 209 Gaussian white noise of amplitude  $\Lambda$  (**Supplementary Information**), and

$$210 \quad \mathbf{F}_i^{(\text{friction})} = -\xi \mathbf{v}_i$$

211 corresponding to the friction of the cells on the underlying substrates.

212 We complemented this description by adding a viscous dissipation term accounting for  
 213 cortical deformation and cytoplasmic flows, which reads:

$$214 \quad F_i^{(\text{viscous})} = \sum_j \eta_{(i,j)} t_{(i,j)} \cdot (v_j - v_i) t_{(i,j)}$$

215 where  $t_{(i,j)}$  is a unit vector oriented between the vertex  $i$  and  $j$ , which is either another vertex,  
 216 in which case  $\eta_{(i,j)} = \eta^{(s)}$  is the viscous modulus dissipation along the cell surface (cortex), or  
 217 the cell barycenter, in which case  $\eta_{(i,j)} = \eta^{(b)}$  is a viscous modulus, representing dissipation  
 218 within the cell bulk (cytoplasm) (details in the **Supplementary Information**).

219

220 First, we conducted simulations for the RUSH-EGFR experiment (**Fig. 1e, f**), considering a  
 221 down-step in intercellular viscosity on selected clusters of cells (N=4 cells) dispersed in a cell  
 222 monolayer at equilibrium (**Fig. 4a and Supplementary Information**). We used a set of  
 223 parameters summarised in **Supplementary Table I**, which were optimised to quantitatively  
 224 reproduce the experimental results, while remaining within the typical range used to describe  
 225 MDCK monolayers. In the simulations, a 10-fold decrease (from  $\eta=1.4$  nN.min. $\mu\text{m}^{-1}$  (30 a.u)  
 226 to  $\eta=0.14$  nN.min. $\mu\text{m}^{-1}$  (3 a.u)) in intercellular viscosity leads to a 4-fold increase (from  $2.6 \pm$   
 227  $0.1$  to  $10.6 \pm 3.7$   $\mu\text{m}/\text{h}$ ; N=100) in the junction elongation velocity (**Fig. 4b, c and**

228 **Supplementary Video 7**), aligning closely with the experimental values (from  $2.6 \pm 0.5$  to  $14.3$   
229  $\pm 1.2$   $\mu\text{m}/\text{h}$ ) ( **Fig. 1f**).

230  
231 Second, we conducted simulations of collective cell migration along the strips (details in  
232 **Supplementary Information**). We maintained the same set of parameters while introducing  
233 additional conditions: (1) we posited that the inhibition of EGFR by Erlotinib leads to  
234 intracellular viscosity equivalent to its downregulation in dense monolayers, given their  
235 comparable recruitment levels. We hence set it to  $\eta = 1.4$   $\text{nN}\cdot\text{min}\cdot\mu\text{m}^{-1}$  (30 a.u) and (2) we  
236 imposed the velocity of the migration front to align with experimental values of  $15$   $\mu\text{m}/\text{h}$  (**Fig.**  
237 **3g**). Subsequently, we tuned the intercellular viscosity of the Ctrl case to match the  
238 experimental results, finding that  $\eta = 0.28$   $\text{nN}\cdot\text{min}\cdot\mu\text{m}^{-1}$  (6 a.u) yielded the best quantitative  
239 predictions. The **Supplementary Video 7** shows a typical simulation output (**Fig. 4d-f**). Both  
240 experimental and simulated data underwent analysis using the same scheme. Notably, a  
241 sizeable increase in cell strain (**Fig. 4g**), a decrease in cell velocity (**Fig. 4h**), a reduction in  
242 vorticity (**Fig. 4i**), an expansion in spatial correlation length (**Supplementary Fig. 4**), as well as  
243 an elevation in cell shape relaxation times  $t_{\text{visc}}$  (**Fig. 4j, k**) were observed between  $\eta = 0.28$   
244  $\text{nN}\cdot\text{min}\cdot\mu\text{m}^{-1}$  (6 a.u) au (Ctrl) and  $\eta = 1.4$   $\text{nN}\cdot\text{min}\cdot\mu\text{m}^{-1}$  (30 a.u) (Erlotinib). These quantitative  
245 findings closely matched the experimental observations (**Fig. 4l**).

246 In conclusion, we propose that the E-cadherin-dependent phosphorylation of EGFR fine-tunes  
247 the structure of junctional actin, thereby affecting actin dynamics. On a larger scale, it  
248 influences junctional viscosity, governing the collective modes of cell migration (**Fig. 2g**). This  
249 insight demonstrates that E-cadherin-dependent EGFR activity could regulate the dynamics  
250 of collective cell behavior and sheds light on the role of cellular viscous dissipation in collective  
251 cell migration, an important aspect that has been understudied.

252

## 253 **Methods**

### 254 **Cell culture and reagents**

255 MDCK strain II cells were cultured at 37°C with 5% CO<sub>2</sub> in high-glucose Dulbecco's Modified  
256 Eagle Medium (DMEM, Invitrogen). The medium was supplemented with 10% fetal bovine  
257 serum (FBS, Invitrogen), and 100 units/mL of penicillin and 100 µg/mL of streptomycin (Pen-  
258 strep, Invitrogen).

259 To investigate collective migration behaviours, we utilised stable cell lines expressing  
260 fluorescent markers or knockout variants of MDCK cells. The following cell lines were  
261 employed: wild-type MDCK (MDCK-WT), stably transfected GFP–actin MDCK (MDCK-actin-  
262 GFP), stably transfected GFP–E-cadherin MDCK (MDCK-E-cad-GFP) (kindly provided by W. J.  
263 Nelson), histone-1–stable GFP MDCK (MDCK-H1-GFP), E-cad KO MDCK (MDCK-Ecad KO)  
264 (kindly provided by B. Ladoux, Institut Jacques Monod), and E-cad Rescue MDCK (MDCK-Ecad  
265 Res) (kindly provided by P. Kanchanawong, Mechanobiology Institute).

266 For serum starvation experiments, cells were subjected to serum starvation by incubating  
267 them in a growth medium. This medium consisted of high-glucose DMEM lacking FBS,  
268 supplemented with 100 units/mL of penicillin and 100 µg/mL of streptomycin. To inhibit EGFR  
269 activity, Erlotinib hydrochloride (1µM, Sigma-Aldrich) was employed.

270

### 271 **Plasmids and transfection**

272 The Str-KDEL\_SBP-EGFP-EGFR plasmid was generously provided by Dr. David Marc Virshup's  
273 laboratory at Duke NUS. The "SH2-GRB2-tdEOS" plasmid was kindly gifted by Dr. Jay T Groves'  
274 Lab. MDCK-WT cells, with 80% confluence, were transfected with 3 µg of DNA using the Neon  
275 electroporation system (Invitrogen), following the manufacturer's instructions. For Erk  
276 activity measurement, EKAREV-NLS expressing MDCK cells were a kind gift from Dr. Tsuyoshi  
277 Hirashima's Laboratory at Mechanobiology Institute, NUS.

278

### 279 **Stamp preparation for collective cell migration on line-patterned strips**

280 Master molds featuring the desired pattern were crafted using SU8-3050 resist on silicon  
281 wafers through standard lithography techniques. The pattern employed in this study  
282 encompasses a sizable rectangular "reservoir" (approximately 5000 x 700 µm),  
283 interconnected with 10 rectangular strips (around 3000 x 400 µm each)<sup>24</sup>. Subsequently,  
284 Polydimethylsiloxane (PDMS) stamps were derived from these wafers and utilised for  
285 microcontact printing.

286 The PDMS stamps were incubated with Fibronectin (50µg/ml, Merck) for a duration of 45  
287 minutes, after which they were transferred onto a 35 mm uncoated imaging dish (Ibidi) via  
288 microcontact printing. Prior to Fibronectin stamping, the dish had been pre-coated with a  
289 layer of PDMS and exposed to UV light for activation. The PDMS stamps were then air-dried  
290 within a laminar hood for 10 minutes and delicately pressed against the dish's bottom for 1



291 minute. Following microcontact printing, the PDMS stamps were carefully lifted without  
292 causing any agitation. The dish bearing the Fibronectin-stamped pattern underwent  
293 additional passivation by treating it with a 2% Pluronic F127 solution (Sigma) for 1 hour, aimed  
294 at preventing cells from attaching and proliferating in the unstamped areas. Subsequent to  
295 passivation, the dishes underwent thorough rinsing with PBS on three times. A PDMS block  
296 was strategically positioned atop the microcontact-printed pattern, effectively confining cells  
297 within the "reservoir" region. MDCK-H1-GFP, MDCK-Ecad KO, or MDCK-Ecad Res cells were  
298 pre-treated with Mitomycin C at a concentration of 10 $\mu$ g/ml (Roche) for a duration of 1 hour  
299 to inhibit cell proliferation. These MDCK cells were trypsinised and strategically seeded along  
300 the periphery of the PDMS block to cover the "reservoir" area. Once the cells reached  
301 confluence on the PDMS block's sides, the block was gently released, enabling cells to migrate  
302 along the strips. Migrating cells were subsequently subjected to specific inhibitors as  
303 indicated. The process of live imaging was executed using widefield microscopy (Olympus  
304 IX81) with a 10x objective. Throughout imaging, the dishes were maintained within a  
305 humidified environment at 37°C with 5% CO<sub>2</sub>. Both phase-contrast and fluorescent images  
306 were acquired at intervals of 4 minutes over a duration ranging from 12 to 24 hours.

307

### 308 **Obstacle migration**

309 The design employed for obstacle migration involves a substantial rectangular "reservoir"  
310 (approximately 5000 x 700  $\mu$ m), which is linked to 10 rectangular strips (around 3000 x 400 $\mu$ m  
311 each). Each strip features a central circle with a diameter of 200 $\mu$ m. The PDMS stamps crafted  
312 from these wafers encompass 200 $\mu$ m diameter circles within each strip. The subsequent  
313 preparation steps remain consistent with those outlined in the preceding section. Following  
314 contact printing and passivation, the 200 $\mu$ m diameter circles exhibit non-adhesive properties,  
315 serving as obstacles during cell migration.

316

### 317 **Single-cell without confinement, single-cell confined to lines, cell trains and cell patches** 318 **migration**

319 For the migration of single cell lines, wafers with a pattern of 20 $\mu$ m lines were utilised. PDMS  
320 stamps were crafted from these wafers and subsequently employed for microcontact  
321 printing. The preparation steps mirrored those outlined in the preceding section. Following  
322 passivation, the dishes were primed for cell seeding. MDCK-H1-GFP or MDCK-WT cells were  
323 trypsinised and their counts were determined prior to seeding. Approximately 4-5 x10<sup>4</sup> MDCK  
324 cells were introduced into the imaging dish and allowed to incubate for 2 hours at 37 °C within  
325 a 5% CO<sub>2</sub> incubator, facilitating full cellular spreading. The migrating cells were then subjected  
326 to the indicated inhibitors.

327 For the migration of cell trains, the employed pattern comprises a large rectangular  
328 "reservoir" (approximately 5000 x 700  $\mu$ m), which is linked to 20 rectangular strips  
329 (approximately 3000 x 20 $\mu$ m). The preparation steps mirror those outlined in the preceding  
330 section for the creation of line-patterned strips. The migrating cells were subjected to  
331 treatment using the specified inhibitors.

332 In the case of single-cell and cell patch migration, Fibronectin-coated dishes were utilised for  
333 direct cell seeding. A quantity of  $4-5 \times 10^4$  MDCK cells (for single cells) and  $3-4 \times 10^5$  MDCK  
334 cells (for cell patches) were seeded into the imaging dish and incubated at 37 °C within a 5%  
335 CO<sub>2</sub> incubator for 2 hours to allow for complete cell spreading. The migrating cells were  
336 subsequently treated with the indicated inhibitors.

337 Live imaging was conducted using widefield microscopy (Olympus IX81) with either a 10x or  
338 20x objective. The dishes were positioned within a humidified chamber at 37 °C with 5% CO<sub>2</sub>  
339 during the imaging process. Phase-contrast and fluorescent images were captured at 10-  
340 minute intervals, spanning a duration ranging from 12 to 24 hours. Migration speeds of  
341 individual cells ( $n > 30$ ) were tracked using either the TrackMate plugin for Image J on phase-  
342 contrast images or Imaris for fluorescent nucleus images. The speed of junction deformation  
343 at cell-cell junctions was quantified by measuring the lengths of these junctions at each time  
344 point.

345

#### 346 **Dextran experiments**

347 MDCK-H1-GFP cells (for live imaging) or MDCK-WT cells (for western blotting) were seeded at  
348 a low confluence and subjected to overnight serum starvation. Subsequently, 50µg/mL of  
349 dextran (00269, 00891, 00894, Sigma-Aldrich) with the specified molecular weight was  
350 introduced to the cells before the execution of either western blotting or live imaging. The  
351 latter was performed using a widefield microscopy setup (Olympus IX81) equipped with a 20x  
352 objective. Cell velocity and confinement ratio were assessed using the Trackmate plugin  
353 within Fiji.

354

#### 355 **EGFR release experiment**

356 MDCK-WT cells were transfected with the RUSH plasmid Str-KDEL\_SBP-EGFP-EGFR. Following  
357 transfection, the cells were plated onto an Ibidi imaging dish pre-coated with Fibronectin and  
358 placed in a complete medium at 37°C with 5% CO<sub>2</sub>. Once the cells reached confluency,  
359 overnight serum starvation was conducted. Subsequently, EGFR-GFP was liberated from the  
360 endoplasmic reticulum (ER) through the addition of 40mM biotin. Live imaging was carried  
361 out utilising a spinning-disc confocal microscope (Yokogawa CSU-W1) attached to a Nikon  
362 Eclipse Ti-E inverted microscope body, equipped with a 60x NA1.3 water lens. Fluorescent  
363 images were captured both prior to and subsequent to the biotin introduction, at 5-minute  
364 intervals, spanning a duration of 6 hours. The speed of deformation at cell-cell junctions was  
365 quantified by measuring the lengths of these junctions at each time point, both 30 minutes  
366 before and 30 minutes after the release of EGFR. The measurements were then averaged over  
367 this 30-minute period.

368

#### 369 **Western blotting**

370 Cells were incubated on ice with RIPA lysis buffer (Sigma), supplemented with protease and  
371 phosphatase inhibitor cocktails (Sigma). Subsequently, lysates underwent SDS-PAGE and  
372 were transferred onto nitrocellulose membranes. The membranes were then blocked using  
373 5% BSA and 0.05% Tween 20 in TBS, followed by incubation with the specified primary  
374 antibodies. Detection of immune complexes was achieved using appropriate HRP-conjugated  
375 secondary antibodies (Cell Signaling Technologies) and an enhanced chemiluminescence  
376 reagent (Clarity ECL, BioRad). Protein band intensities were quantified using ImageJ Software.  
377 The primary antibodies employed were pEGFR<sup>Y845</sup> (44784G, Thermo Fisher Scientific),  
378 pEGFR<sup>Y1068</sup> (2234, Cell Signaling Technologies), pEGFR<sup>Y1173</sup> (4407, Cell Signaling  
379 Technologies), EGFR (2232, Cell Signaling Technologies), RhoA (sc418, Santa Cruz), Cdc42  
380 (ab187643, Abcam), Rac1 (610651, BD Biosciences) and  $\beta$ -actin (MA515739, Thermo Fisher  
381 Scientific).

382 To assess Rho family GTPases activity, pull-down assay using GST-PBD and GST-RBD were  
383 performed on cell lysates as described previously<sup>25</sup>.

384

### 385 **Immunofluorescence**

386 After a collective cell migration period of 12-24 hours, MDCK cells were fixed using pre-  
387 warmed 4% paraformaldehyde (PFA) in phosphate-buffered saline (PBS) at 37 °C for 15  
388 minutes. Subsequently, they were permeabilised with 0.2% Triton X-100 in TBS for 30 minutes  
389 at room temperature. Samples were then blocked using 1% BSA in TBS for 1 hour. The cells  
390 were incubated overnight at 4 °C with primary antibodies: rabbit anti-phospho-EGFR (Y845)  
391 polyclonal antibody (44-784G, Thermo Fisher Scientific, diluted 1:200); Purified Mouse anti-  
392 E-Cadherin monoclonal antibody (Clone 36) (610181, BD Transduction Laboratories); WAVE2  
393 antibody (H-110) (sc-33548, Santa Cruz); Arp3 antibody (A5979, Sigma-Aldrich); Phospho-  
394 Myosin Light Chain 2 (Ser19) antibody (3671, Cell Signaling Technologies, diluted 1:50)  
395 according to the manufacturer's instructions. Following three washes with PBS at 10-minute  
396 intervals, cells were incubated with secondary antibodies (anti-mouse Alexa555-conjugated  
397 secondary antibody and anti-Rabbit Alexa647-conjugated secondary antibody, both from  
398 Thermo Fisher Scientific) along with Alexa405-coupled phalloidin (Invitrogen) in darkness at  
399 room temperature for 1 hour. Subsequently, cells were rinsed with PBS and prepared for  
400 imaging acquisition. Confocal images were captured in 3D stacks using a spinning-disc  
401 confocal microscope (Yokogawa CSU-W1) mounted on a Nikon Eclipse Ti-E inverted  
402 microscope body, equipped with a 100x NA1.5 or 60x NA1.3 lens.

403

### 404 **Real-time quantitative PCR (qPCR)**

405 The entire RNA was isolated from a single well of a 6-well plate using the RNeasy Plus Micro  
406 Kit (QIAGEN), following the guidelines provided by the manufacturer. A quantity of 450ng of  
407 total RNA was employed to generate the cDNA utilising the cDNA synthesis kit (SensiFAST™).  
408 For qPCR analysis, the FastStart Universal SYBR Green Master (ROX) mix was employed on a  
409 CFX96 Touch Real-Time PCR detection system (Bio-Rad). GAPDH was employed as the internal  
410 reference gene.

411

## 412 **Live cell spreading on E-cadherin-coated surface**

413 Disks with a diameter of 25µm were photopatterned onto glass coverslips, following the  
414 previously described method<sup>26</sup>. These patterns were then coated overnight at 4°C with a  
415 recombinant E-cadherin Fc Tag protein (10204, Sino Biological) at a concentration of  
416 20µg/mL, and subsequently gently washed with PBS. The patterned coverslips were mounted  
417 within imaging chambers.

418 MDCK-WT cells were transfected with the SH2-GRB2-TdEos plasmid, and after selection with  
419 500 µg/mL Geneticin (10131035, Thermo Fisher Scientific), a stable cell line was established  
420 following sorting using an SH800S cell sorter (Sony). MDCK-SH2-GRB2-TdEos or MDCK-Ecad-  
421 GFP cells were serum-starved overnight, then seeded onto Ecad-Fc patterns, and allowed to  
422 spread for a period of 2 hours before initiating TIRF time-lapse imaging. This imaging was  
423 carried out using a Motorised TIRF Module (Nikon) integrated with a Nikon Eclipse Ti-E  
424 inverted microscope body.

425

## 426 **Fluorescence recovery after photobleaching (FRAP)**

427 Bleaching was performed on the actin of apical cell-cell junctions for FRAP measurements.  
428 The cortical actin recovery time ( $t_{half}$ ) was calculated by fitting the following exponential  
429 function to the recovery curves:

$$430 \quad I(t) - I(0) = (I_{\infty} - I(0)) \left( 1 - \exp\left(-\ln 2 \frac{t}{t_{half}}\right) \right)$$

431

## 432 **Laser ablation**

433 An initial image was acquired to determine the precise laser spots. In the case of MDCK-actin-  
434 GFP cells, the laser spots were positioned at the apical cell-cell junctions. The pre-acquisition  
435 process involved capturing five images at 1-second intervals. During the acquisition phase, a  
436 laser power of 60% was utilised, with a duration of approximately 1-2 seconds, targeting the  
437 predetermined regions. Subsequently, the post-acquisition stage encompassed the capture  
438 of 100 images at 1-second intervals.

439 To quantify the recoil velocity, the positions of two nodes within the defined junctions were  
440 manually tracked using ImageJ software. Following the laser ablation, the temporal evolution  
441 of the distance between these two nodes was fitted using a single exponential function. While  
442 the double exponential function is commonly employed in other studies, it proved unsuitable  
443 for our analysis. In our investigation, the recoil velocity exhibited a gradual nature, and fitting  
444 it with a double exponential function yielded unrealistically high speeds. Consequently, we  
445 opted to employ a single exponential function for a more appropriate representation.

446

## 447 **Atomic force microscopy (AFM)**

448 AFM experiments were conducted using a Nanowizard IV BioAFM system manufactured by  
449 JPK Instruments, Germany. Indentations were performed on randomly chosen cells at the  
450 junctional regions. This was achieved using a cantilever (with a nominal  $k$  value of 0.03 N/m,  
451 provided by Novascan Technologies, Inc., Ames, IA) with an attached polystyrene bead (4.5  
452  $\mu\text{m}$  diameter) at its tip. The applied force was set at 3 nN and a loading rate of 5  $\mu\text{m/s}$  was  
453 used.

454 For each experimental condition, measurements were taken from over 30 cells across three  
455 independent trials and subsequently averaged. Young's modulus values were used to  
456 quantitatively describe the cellular stiffness. These values were calculated using the JPK Data  
457 Processing Software (JPK Instruments, Germany), which incorporates Hertz's contact model  
458 tailored to spherical indenters (with a diameter of 4.5  $\mu\text{m}$  and a Poisson's ratio of 0.5). Energy  
459 dissipation, representing the heat-based loss of mechanical energy during each indentation  
460 cycle by the AFM tip, was determined by assessing the enclosed area between the approach  
461 and retraction curves (hysteresis). This phenomenon is largely attributed to frictional and  
462 viscous damping within the cell structure at this low speed<sup>27</sup>.

463

## 464 **Erk activity measurement**

465 30000 EKAREV-NLS expressing cells were seeded into a well of culture-inserts 2 wells (81176,  
466 ibidi) and allowed to spread for 8 hours. Simultaneously, the insert was then removed and  
467 cells were serum starved overnight. Time-lapse FRET images were obtained using a Nikon AX  
468 point scanning confocal microscope mounted on a Ti-2 Nikon inverted body. To represent the  
469 FRET efficiency, FRET/CFP ratio images were generated after the background was subtracted  
470 from the original images in the CFP and FRET channel using a matlab code kindly provided by  
471 Tsuyoshi Hirashima's Laboratory at Mechanobiology Institute, NUS. To quantify FRET Ratio  
472 for each cells at each timepoints, the Fiji Trackmate plugin was applied to the CFP channel to  
473 track each cell position overtime.

474

## 475 **Segmentation**

476 We used Cellpose<sup>28</sup> for the cell segmentation. We performed an erosion with a 3x3 square  
477 kernel to each mask to limit the occurrence of gaps between cells; we disregard objects with  
478 areas lower than 20 pixels. We define the cell inertia tensor, with a constant linear weight  
479 density along the segmented cell boundaries, i.e. with  $xx$  component  $I_{xx} = \iint (x - \bar{x})^2 dx dy$ ,  
480 where  $(\bar{x}, \bar{y})$  is the position of the cell barycenter. We call *average shape tensor* field the  
481 spatially and temporally averaged inertia matrix over all cells within 30x30 pixel-large boxes  
482 (corresponding to approx. 10 cells within each), regularly spaced on a spatial grid. The strain  
483 field is defined as  $\epsilon = \log(\lambda_1/\lambda_2)/2$  where  $\lambda_1$  (resp.  $\lambda_2$ ) is the maximum (resp. minimum)  
484 eigenvalue of the average shape tensor. For the cell tracking, we used bTrack<sup>29</sup>.

485

## 486 Simulation of EGFR release experiments

487 In our EGFR release experiments, cells under investigation are located in the bulk of the tissue,  
488 far away from the boundary. In this case, we observe fluctuations in cell edge length but no  
489 obvious cell motions, see **Fig. 1e**. To mimic such fluctuations in cell length, we here consider  
490 active fluctuations of intercellular tension,  $\Lambda_{ij}^{(\text{act})}$ , at each cell-cell interface  $ij$ . These  
491 fluctuations contribute to an active force at each vertex,

$$492 \quad \mathbf{F}_i^{(\text{active})} = \sum_{j \in \text{neighbor}} \Lambda_{ij}^{(\text{act})} \mathbf{t}_{i,j},$$

493 where the summation is over all vertices that connect to the vertex  $i$ . We assume such tension  
494 fluctuations satisfy an Ornstein-Uhlenbeck stochastic dynamic with time correlation<sup>30</sup>,

$$495 \quad \frac{d\Lambda_{ij}^{(\text{act})}}{dt} = -\frac{\Lambda_{ij}^{(\text{act})}}{\tau_\sigma} + \zeta_{ij}(t),$$

496 where  $\tau_\sigma$  is the relaxation time of the active tension and  $\zeta_{ij}(t)$  are independent Gaussian  
497 white noises, satisfying  $\langle \zeta_{ij}(t) \rangle = 0$  and  $\langle \zeta_{ij}(t) \zeta_{kl}(t') \rangle = \Delta_\sigma^2 \delta_{ik} \delta_{jl} \delta(t - t')$  with  $\Delta_\sigma$  being  
498 the fluctuation intensity.

499 We simulated a cell sheet consisting of  $N = 100$  cells in a square box of size  $L = \sqrt{NA_0}$ , using  
500 periodic boundary conditions, see **Supplementary Fig. 1a**. We initialize our simulations from  
501 a random Voronoi cell pattern and let the system relax toward a dynamic steady state where  
502 the cell elongation parameter and cell motion velocity approach a steady plateau<sup>22</sup>.

503 To model the effect of the light activation of EGFR and the possibility of a subsequent viscosity  
504 modulation, we then randomly selected a small group of four cells in contact and decreased  
505 the bulk viscosity  $\eta_j^{(b)}$  of those four cells, from the default value (with  $\eta_j^{(b)}(t < 0) = \eta^{(\text{CTL})}$ )  
506 to a lower value (with  $\eta_j^{(b)}(t > 0) = \eta^{(\text{EGFR+})}$ ), see **Supplementary Fig. 1b**. Further, the  
507 viscosity  $\eta_{ij}^{(s)}$  along the cell-cell interface between the vertices  $i$  and  $j$  is assumed to be the  
508 average viscosity of the two contacting cells (indexed by  $J$  and  $K$ ) as  $\eta_{ij}^{(s)} = (\eta_J^{(b)} + \eta_K^{(b)})/2$ .

509 We compare the junction remodeling velocity,  $\dot{l}$ , before and after the drop in viscosity. We  
510 find that the ratio of the junction remodeling velocity  $\dot{l}_{\text{after}}/\dot{l}_{\text{before}}$  increases with the ratio of  
511 the cell viscosity decrease,  $\eta^{(\text{CTL})}/\eta^{(\text{EGFR+})}$  (**Supplementary Fig. 2**). In particular, the data of  
512  $\eta^{(\text{CTL})}/\eta^{(\text{EGFR+})} = 10$  agree with our experiments (**Supplementary Fig. 2**).

513 We provide the default parameter values for such simulations in **Supplementary Table I**.

514

## 515 Simulation of collective cell migration experiments

516 To simulate the collective cell migration experiments, we now turn to collective cells initially  
517 confined in a rectangular geometry of size  $L_x \times L_y$  with  $L_x = 18\sqrt{A_0}$  and  $L_y = 100\sqrt{A_0}$ ,  
518 which contains around  $N_{\text{cell}} \approx 1800$  cells, see **Supplementary Fig. 3**.

519 As in the RUSH-EGFR model simulation, we first initialize the simulations using a Voronoi  
520 tessellation. We then let the system relax, keeping the bottom boundary fixed and simulating  
521 the cell sheet in a confined rectangular geometry to reach a steady state. We next relax the  
522 bottom boundary and run the simulations to reach a dynamic steady state.

523 At the left, top, and right borders, cells are allowed to slip along but adhere to the boundaries;  
524 while at the bottom boundary, we imposed vertices to move at a constant speed

$$525 \quad v_y(\text{bottom boundary vertices}) = -V_{\text{front}}, \quad v_x(\text{bottom boundary vertices}) = 0.$$

526 The value of  $V_{\text{front}}$  is fixed at a comparable value to the one measured in experiments.  
527 Specifically, we set  $V_{\text{front}} = 15 \mu\text{m/h}$  in simulations.

528 With the sole migration at the edge (described above), we were not able to recapitulate the  
529 formation of vortices similar to the one observed in experiments.

530 To recapitulate the formation of vortices similar to the one observed in experiments, we  
531 turned to a Vicsek-like model of cell motility<sup>23</sup>. Within such model, we associate each cell with  
532 an active force  $\mathbf{F}_J^{(\text{act})} = T_0(\cos\theta_J, \sin\theta_J)$  of magnitude  $T_0$  and direction  $\theta_J$ ; such model  
533 mimics the cell motility induced by cell protrusions<sup>23</sup>, with the polar direction  $\theta_J$  of each cell  
534  $J$  evolving according to the equation:

$$535 \quad \frac{d\theta_J}{dt} = \frac{1}{n_J} \sum_{K \in \text{neighbor}} \left\{ \mu_{LA} \sin \left[ \theta_K^{(\text{vel})} - \theta_J \right] + \mu_{CIL} \sin \left( \alpha_{J,K} - \theta_J \right) \right\} + \zeta_J(t)$$

536 where  $\mu_{LA}$  and  $\mu_{CIL}$  represent the strengths of local alignment interaction and contact  
537 inhibition of locomotion, respectively;  $\theta_K^{(\text{vel})} = \arg(\mathbf{v}_K)$  refers to the argument angle of the  
538 velocity  $\mathbf{v}_K$  of cell  $K$ ;  $\alpha_{J,K} = \arg(\mathbf{r}_J - \mathbf{r}_K)$  denotes the argument angle of the vector pointing  
539 from cell  $K$  to cell  $J$ ;  $\zeta_J(t)$  is a white-noise process with zero mean and variance  $2D_r$ . For the  
540 cells at the free boundary, we constrain their polar active force direction  $\theta_J$  to orient normally  
541 to the free boundary and toward the free space.

542 To mimic cell flows from the top boundary (bulk region of MDCK cell sheet), we allow cell  
543 divisions on a top region which is within a distance  $d < 5$  cell length to the top boundary, see  
544 **Supplementary Fig. 3**. We perform cell divisions once cells within such a region exceed an  
545 area threshold  $A_{\text{div}} = 1.5A_0 = 486\mu\text{m}^2$ .

546 We provide the default parameter values for such simulations in **Supplementary Table II**.

547 We are interested in and examine the collective cell dynamics in a region near the moving  
548 front (within a distance of  $\sim 30$  cell length to the moving front). Note that to reduce the  
549 artificial effect of the top boundary condition on collective cell migration dynamics in a region

550 near the moving front, we have set a sufficiently large scale of the simulated cell monolayer  
551 in the vertical direction, i.e.,  $L_y \sim 100$  cell length.

552

### 553 **Data display and statistics**

554 Prism (GraphPad Software) and Matlab (Math Works) were used for data analysis and graph  
555 plotting. Graphs were mounted using Adobe Illustrator. ANOVA test and paired or unpaired  
556 Student's t-test were carried out to analyse the significant difference levels.

557

### 558 **Acknowledgements:**

559 V.V and MS acknowledge support from MOE grant MOE2016-T3-1-002, NRF grant  
560 NRFI2018-07 and Seed funding from MBI  
561 J.-F. R. is hosted at the Laboratoire Adhésion Inflammation (LAI). The project leading to this  
562 publication has received funding from France 2030, the French Government program  
563 managed by the French National Research Agency (ANR-16-CONV-0001) and from  
564 Excellence Initiative of Aix-Marseille University - A\*MIDEX. J.-F. R. is also funded by ANR-20-  
565 CE30-0023 COVFEE

566

### 567 **Author contributions:**

568 Fu Chaoyu performed the migration experiments, their quantification and wrote the  
569 manuscript. F. Dilasser performed the single cell experiments and the dextran experiment,  
570 the pull-down assay. Zhao-zhen Lin performed all simulations. Marx Karnat did all the  
571 segmentation and tracking, Sound Wai Phow and Tsuyoshi Hirashima helped with the ERK  
572 experiments. Hui Ting Ong helped with image analysis. Nai Mui Hoon Brenda performed the  
573 AFM experiments. Harini performed the QPCR, Aditya Arora contributed to the  
574 understanding of the experimental results. Michael Sheetz initiated the work on EGFR and  
575 supervised C.F. Jean-Francois Rupprecht supervised the simulation work and contributed to  
576 the manuscript. Sham Tlili performed the relaxation time analysis and contributed to the  
577 theoretical part of the work. Virgile Viasnoff designed the experiments, contributed to the  
578 manuscript and supervised the work.

579

### 580 **Conflict of Interest:**

581 The authors declare no conflict of interest.

582

### 583 **Reference:**

- 584 1. Martin, A.C., Kaschube, M. & Wieschaus, E.F. Pulsed contractions of an actin-myosin  
585 network drive apical constriction. *Nature* **457**, 495-499 (2009).
- 586 2. Bertet, C., Sulak, L. & Lecuit, T. Myosin-dependent junction remodelling controls  
587 planar cell intercalation and axis elongation. *Nature* **429**, 667-671 (2004).
- 588 3. Reffay, M. *et al.* Interplay of RhoA and mechanical forces in collective cell migration  
589 driven by leader cells. *Nat Cell Biol* **16**, 217-223 (2014).



- 590 4. Ridley, A.J. Rho GTPase signalling in cell migration. *Curr Opin Cell Biol* **36**, 103-112  
591 (2015).
- 592 5. Mason, F.M., Xie, S., Vasquez, C.G., Tworoger, M. & Martin, A.C. RhoA GTPase  
593 inhibition organizes contraction during epithelial morphogenesis. *J Cell Biol* **214**, 603-  
594 617 (2016).
- 595 6. Heer, N.C. & Martin, A.C. Tension, contraction and tissue morphogenesis.  
596 *Development* **144**, 4249-4260 (2017).
- 597 7. Pece, S. & Gutkind, J.S. Signaling from E-cadherins to the MAPK pathway by the  
598 recruitment and activation of epidermal growth factor receptors upon cell-cell  
599 contact formation. *J Biol Chem* **275**, 41227-41233 (2000).
- 600 8. Fu, C., Arora, A., Engl, W., Sheetz, M. & Viasnoff, V. Cooperative regulation of  
601 adherens junction expansion through epidermal growth factor receptor activation. *J*  
602 *Cell Sci* **135** (2022).
- 603 9. Xu, K.P., Yin, J. & Yu, F.S. SRC-family tyrosine kinases in wound- and ligand-induced  
604 epidermal growth factor receptor activation in human corneal epithelial cells. *Invest*  
605 *Ophthalmol Vis Sci* **47**, 2832-2839 (2006).
- 606 10. Boncompain, G. *et al.* Synchronization of secretory protein traffic in populations of  
607 cells. *Nat Methods* **9**, 493-498 (2012).
- 608 11. Saxena, M. *et al.* EGFR and HER2 activate rigidity sensing only on rigid matrices. *Nat*  
609 *Mater* **16**, 775-781 (2017).
- 610 12. Antczak, C., Mahida, J.P., Bhinder, B., Calder, P.A. & Djaballah, H. A high-content  
611 biosensor-based screen identifies cell-permeable activators and inhibitors of EGFR  
612 function: implications in drug discovery. *J Biomol Screen* **17**, 885-899 (2012).
- 613 13. Hino, N. *et al.* ERK-Mediated Mechanochemical Waves Direct Collective Cell  
614 Polarization. *Dev Cell* **53**, 646-660 e648 (2020).
- 615 14. Hall, A. Rho GTPases and the actin cytoskeleton. *Science* **279**, 509-514 (1998).
- 616 15. Verma, S. *et al.* A WAVE2-Arp2/3 actin nucleator apparatus supports junctional  
617 tension at the epithelial zonula adherens. *Mol Biol Cell* **23**, 4601-4610 (2012).
- 618 16. Arora, A. *et al.* Cortical ductility governs cell-cell adhesion mechanics. *bioRxiv*  
619 *preprint* (2023).
- 620 17. Tlili, S. *et al.* Migrating Epithelial Monolayer Flows Like a Maxwell Viscoelastic Liquid.  
621 *Phys Rev Lett* **125**, 088102 (2020).
- 622 18. Honda, H. & Eguchi, G. How much does the cell boundary contract in a monolayered  
623 cell sheet? *J Theor Biol* **84**, 575-588 (1980).
- 624 19. Barton, D.L., Henkes, S., Weijer, C.J. & Sknepnek, R. Active Vertex Model for cell-  
625 resolution description of epithelial tissue mechanics. *PLoS Comput Biol* **13**, e1005569  
626 (2017).
- 627 20. Fletcher, A.G., Osterfield, M., Baker, R.E. & Shvartsman, S.Y. Vertex models of  
628 epithelial morphogenesis. *Biophys J* **106**, 2291-2304 (2014).
- 629 21. Alt, S., Ganguly, P. & Salbreux, G. Vertex models: from cell mechanics to tissue  
630 morphogenesis. *Philos Trans R Soc Lond B Biol Sci* **372** (2017).
- 631 22. Lin, S.Z., Merkel, M. & Rupperecht, J.F. Structure and Rheology in Vertex Models  
632 under Cell-Shape-Dependent Active Stresses. *Phys Rev Lett* **130**, 058202 (2023).
- 633 23. Lin, S.Z., Ye, S., Xu, G.K., Li, B. & Feng, X.Q. Dynamic Migration Modes of Collective  
634 Cells. *Biophys J* **115**, 1826-1835 (2018).
- 635 24. Vedula, S.R. *et al.* Emerging modes of collective cell migration induced by  
636 geometrical constraints. *Proc Natl Acad Sci U S A* **109**, 12974-12979 (2012).

- 637 25. Guilluy, C., Dubash, A.D. & Garcia-Mata, R. Analysis of RhoA and Rho GEF activity in  
638 whole cells and the cell nucleus. *Nat Protoc* **6**, 2050-2060 (2011).
- 639 26. Azoune, A., Storch, M., Bornens, M., They, M. & Piel, M. Simple and rapid process  
640 for single cell micro-patterning. *Lab Chip* **9**, 1640-1642 (2009).
- 641 27. Yang, R. *et al.* Characterization of mechanical behavior of an epithelial monolayer in  
642 response to epidermal growth factor stimulation. *Exp Cell Res* **318**, 521-526 (2012).
- 643 28. Stringer, C., Wang, T., Michaelos, M. & Pachitariu, M. Cellpose: a generalist algorithm  
644 for cellular segmentation. *Nat Methods* **18**, 100-106 (2021).
- 645 29. Ulicna, K., Vallardi, G., Charras, G. & Lowe, A.R. Automated Deep Lineage Tree  
646 Analysis Using a Bayesian Single Cell Tracking Approach. *Frontiers in Computer*  
647 *Science* **3** (2021).
- 648 30. Tlili, S. *et al.* Shaping the zebrafish myotome by intertissue friction and active stress.  
649 *Proc Natl Acad Sci U S A* **116**, 25430-25439 (2019).
- 650 31. Nakagawa, M., Fukata, M., Yamaga, M., Itoh, N. & Kaibuchi, K. Recruitment and  
651 activation of Rac1 by the formation of E-cadherin-mediated cell-cell adhesion sites. *J*  
652 *Cell Sci* **114**, 1829-1838 (2001).
- 653 32. Kovacs, E.M., Ali, R.G., McCormack, A.J. & Yap, A.S. E-cadherin homophilic ligation  
654 directly signals through Rac and phosphatidylinositol 3-kinase to regulate adhesive  
655 contacts. *J Biol Chem* **277**, 6708-6718 (2002).
- 656 33. Betson, M., Lozano, E., Zhang, J. & Braga, V.M. Rac activation upon cell-cell contact  
657 formation is dependent on signaling from the epidermal growth factor receptor. *J*  
658 *Biol Chem* **277**, 36962-36969 (2002).
- 659 34. Rottner, K., Faix, J., Bogdan, S., Linder, S. & Kerkhoff, E. Actin assembly mechanisms  
660 at a glance. *J Cell Sci* **130**, 3427-3435 (2017).
- 661 35. Yamazaki, D., Oikawa, T. & Takenawa, T. Rac-WAVE-mediated actin reorganization is  
662 required for organization and maintenance of cell-cell adhesion. *J Cell Sci* **120**, 86-  
663 100 (2007).
- 664 36. Erasmus, J.C., Welsh, N.J. & Braga, V.M. Cooperation of distinct Rac-dependent  
665 pathways to stabilise E-cadherin adhesion. *Cell Signal* **27**, 1905-1913 (2015).
- 666 37. Lozano, E., Frasa, M.A., Smolarczyk, K., Knaus, U.G. & Braga, V.M. PAK is required for  
667 the disruption of E-cadherin adhesion by the small GTPase Rac. *J Cell Sci* **121**, 933-  
668 938 (2008).
- 669

670

671 **Figures**

**a Reducing EGFR phosphorylation Impedes cell junction deformation (I).**

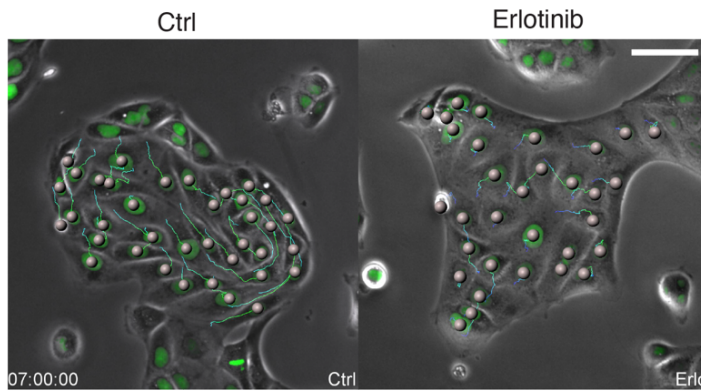

**b**

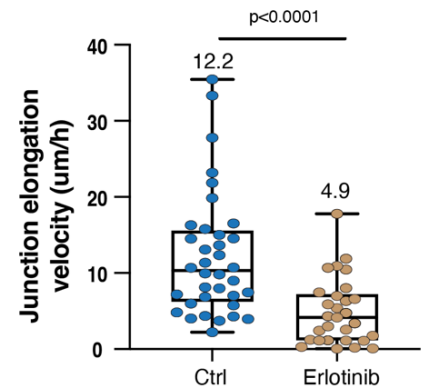

**Impeding cell junction deformation reduces EGFR phosphorylation (II).**

**c**

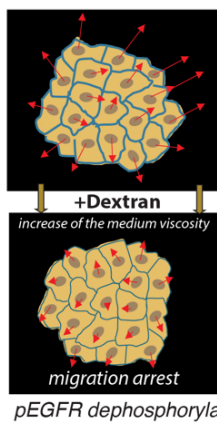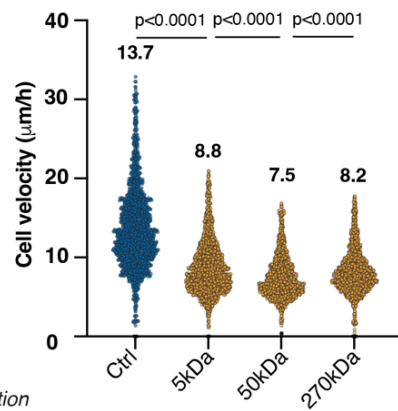

**d**

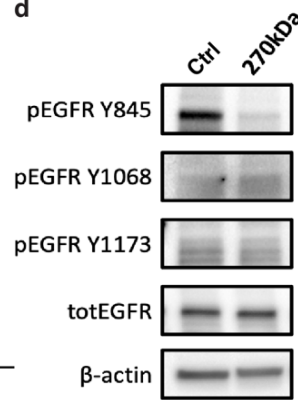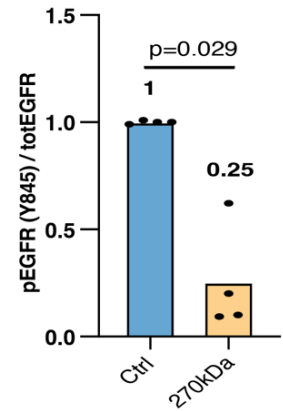

**Inducing pEGFR phosphorylation promotes cell junction deformation (III).**

**e**

*Mosaic expression of RUSH-EGFR*

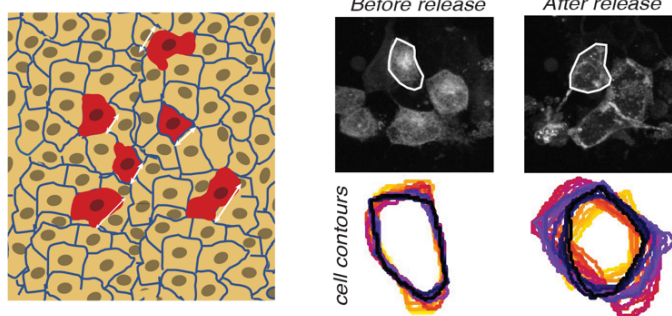

**f**

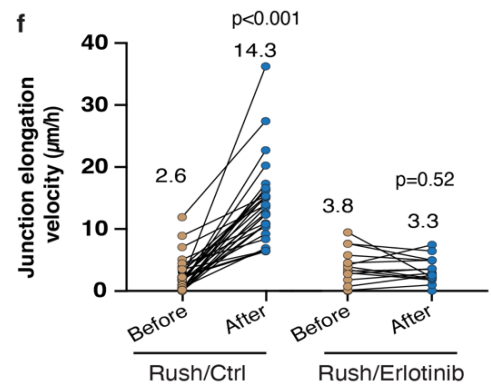

**Promoting cell junction deformation induces EGFR phosphorylation (IV).**

**g**

*Spontaneous rotation around an obstacle*

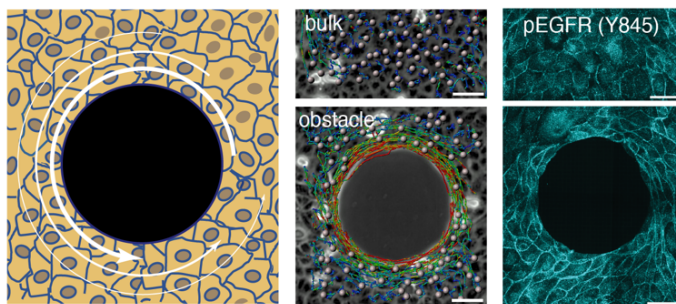

**h**

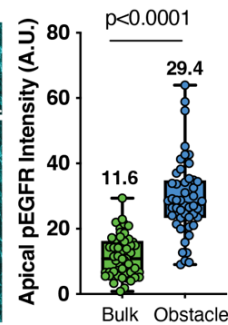

**i**

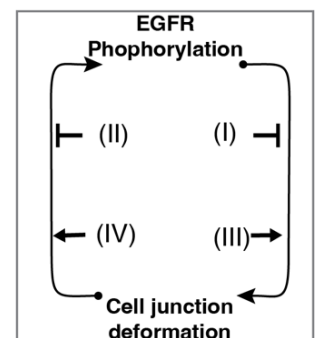

673

674 **Fig. 1: A positive feedback loop between apical EGFR phosphorylation and cell junction**  
675 **deformation.**

676 **a.** Representative patches of MDCK cells under control and EGFR-inhibited conditions  
677 (Erlotinib at 1 $\mu$ M) including the tracking or individual cell trajectories. Scale bar: 100  $\mu$ m.

678 **b.** Quantification of individual junction elongation velocities in the patches (mean value  $\pm$  s.d.)  
679  $n_{\text{Ctrl}} = 36$  junctions and  $n_{\text{Erlotinib}} = 29$  junctions from 3 independent experiments, two-tailed  
680 unpaired t-test,  $p < 0.0001$ .

681 **c.** Schematics of the experiment for cell arrest by dextran addition. Quantification of  
682 individual cell migration velocity 10 minutes after adding dextran with various molecular  
683 weights (mean value  $\pm$  s.d.  $n=1735-1925$  cells from 3 independent experiments.)

684 **d.** Western Blot and its quantification of EGFR phosphorylated states (Y845) before and after  
685 cell arrest from 4 independent experiments, two-tailed unpaired t-test,  $p = 0.029$ .

686 **e.** Experimental setup schematics (left) and segmented contours quantification (right) of cell  
687 mosaically expressing RUSH-EGFR before and after its release from the endoplasmic  
688 reticulum.

689 **f.** Quantifications of junction elongation velocities upon the release of EGFR, under control  
690 and pEGFR-inhibited conditions.  $n_{\text{Rush/Ctrl}} = 28$  junctions and  $n_{\text{Rush/Erlotinib}} = 15$  junctions from 3  
691 independent experiments, two-tailed paired t-test,  $p_{\text{Rush/Ctrl}} < 0.001$ ,  $p_{\text{Rush/Erlotinib}} = 0.52$ .

692 **g.** Schematics of the physical induction of cell elongation around obstacles (left). Images of  
693 cells encircling obstacles and in bulk regions including single cell tracking and apical  
694 localization of pEGFR-Y845 by immunostaining. Scale bar: 50  $\mu$ m.

695 **h.** Quantifications of apical pEGFR-Y845 intensity around obstacles (mean value  $\pm$  s.d.  $n_{\text{Bulk}} =$   
696 50 junctions and  $n_{\text{Obstacle}} = 48$  junctions from 3 independent experiments, two-tailed unpaired  
697 t-test,  $p < 0.0001$ .)

698 **i.** Diagram of a positive feedback loop between apical EGFR phosphorylation and cell junction  
699 deformation.

700

**a EGFR phosphorylation at junction depends on E-cadherins**

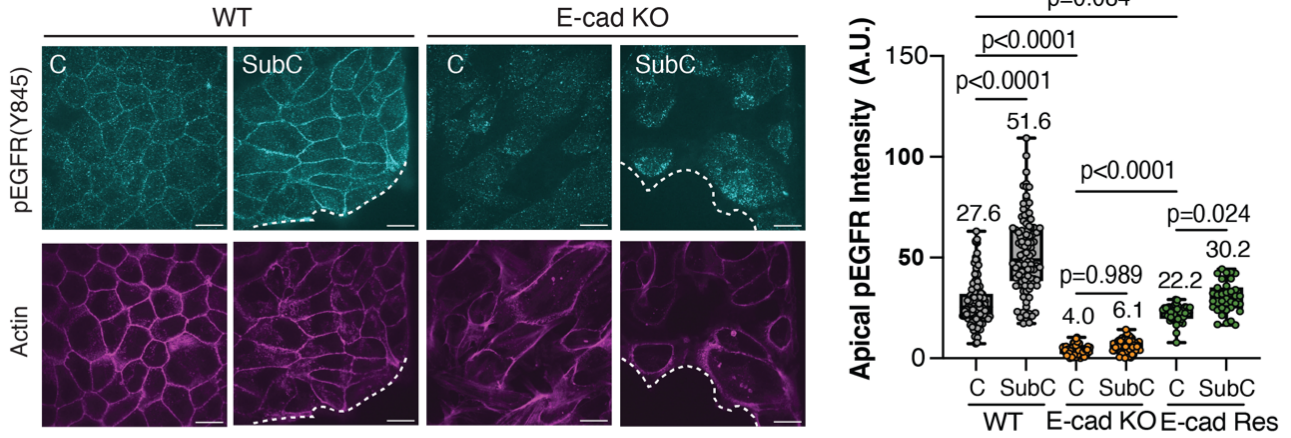

**b Cell spreading on E-cad patterns**

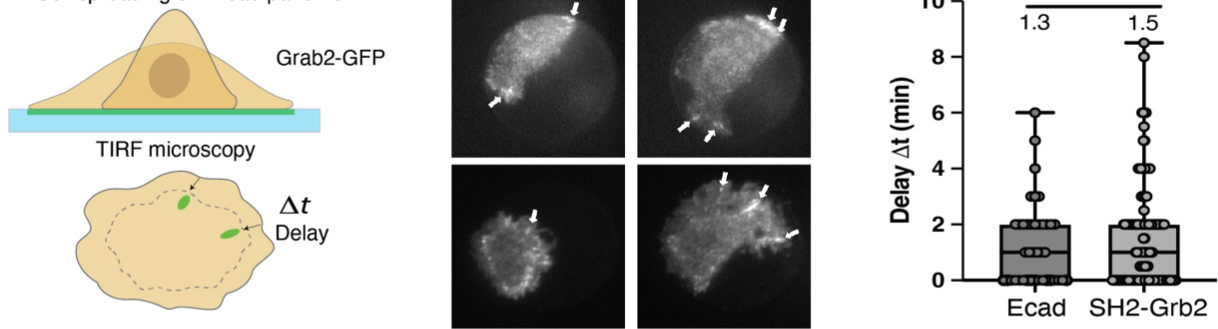

**c Ctrl 270kDa**

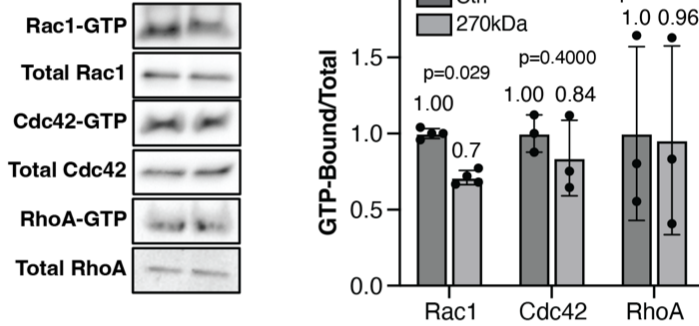

**d**

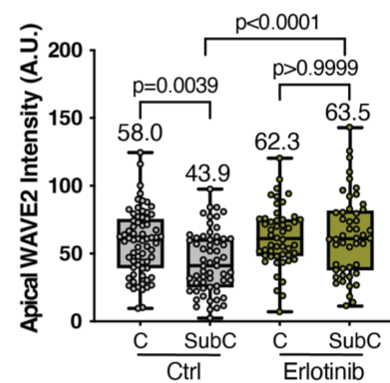

**e**

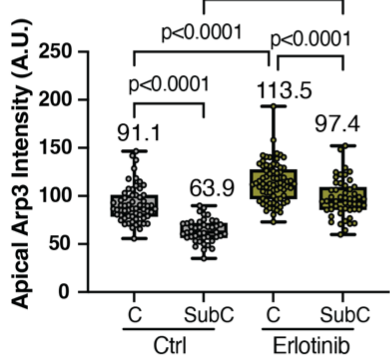

**f**

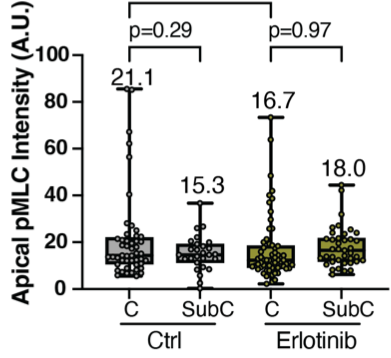

**g**

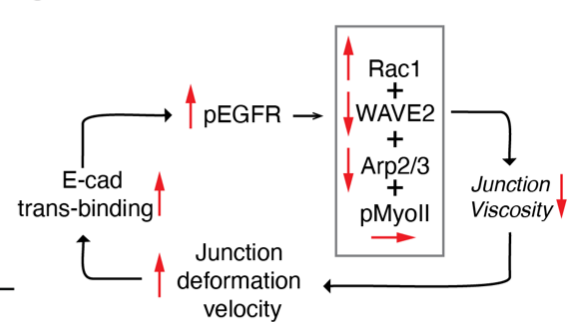

**h Rheological properties of junctional actin**

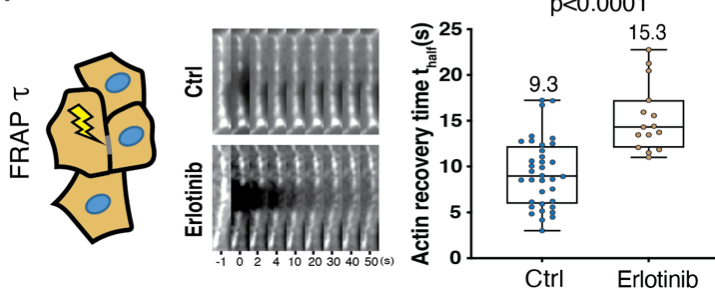

**i**

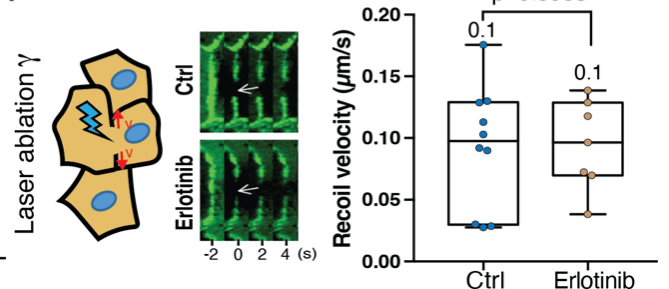

702

703 **Fig. 2: E-cadherin-dependent phosphorylation of EGFR fine-tunes actin dynamics with**  
704 **minimal impact on cortical tension.**

705 **a.** Immunostaining of apical pEGFR (Y845) and actin in wild-type (WT) and E-cadherin knock-  
706 out (Ecad-KO) MDCKs on confluent (C, left) and sub-confluent (SubC, right) regions. Scale Bar:  
707 20  $\mu\text{m}$ . Quantification of apical pEGFR in WT, Ecad-KO and Ecad-KO-rescued (Ecad-Res)  
708 tissues. (WT:  $n_C = 122$  junctions,  $n_{\text{SubC}} = 106$  junctions from 4 independent experiments,  $p <$   
709  $0.0001$ ; Ecad-KO:  $n_C = 67$  junctions,  $n_{\text{SubC}} = 61$  junctions from 3 independent experiments,  $p =$   
710  $0.9893$ ; Ecad-Res:  $n_C = 47$  junctions,  $n_{\text{SubC}} = 34$  cell junctions from 3 independent experiments,  
711  $p = 0.0239$ . Ordinary one-way ANOVA Tukey's test.

712 **b.** Schematic (left) and time-lapse imaging (middle) of SH2-Grb2 (tdEOS) and E-cadherin (GFP)  
713 localization during cell spreading on E-cadherin-coated patterns. Quantification of the  
714 recruitment speed of E-cadherin and SH2-Grb2 (right).  $n_{\text{Ecad}} = 40$  cell adhesions and  $n_{\text{SH2-Grb2}} =$   
715  $132$  cell adhesions from 3 independent experiments, two-tailed unpaired t-test,  $p=0.49$ .

716 **c.** Pull-down assays on Rho family GTPases (Rac1, Cdc42 and RhoA) and quantification of GTP-  
717 bound GTPases post cell arrest by dextran.  $n_{\text{Rac1}} = 4$  WB,  $p=0.029$ ,  $n_{\text{Cdc42}} = 3$  WB,  $p=0.4$  and  
718  $n_{\text{RhoA}} = 3$  WB,  $p>1$ , two-tailed unpaired t-test.

719 **d-f.** Quantification of apical WAVE2 (**d**), Arp3 (**e**) and pMLC (**f**) under control and EGFR  
720 inhibited conditions. Data are the mean value  $\pm$  s.d. WAVE2:  $n_{\text{Ctrl, C}} = 68$  cell junctions,  $n_{\text{Ctrl, SubC}}$   
721  $= 59$  cell junctions from 2 independent experiments,  $n_{\text{Erlotinib, C}} = 50$  cell junctions,  $n_{\text{Erlotinib, SubC}}$   
722  $= 48$  cell junctions from 2 independent experiments; Arp3:  $n_{\text{Ctrl, C}} = 60$  cell junctions,  $n_{\text{Ctrl, SubC}} =$   
723  $43$  cell junctions from 2 independent experiments,  $n_{\text{Erlotinib, C}} = 74$  cell junctions,  $n_{\text{Erlotinib, SubC}} =$   
724  $52$  cell junctions from 2 independent experiments; pMLC:  $n_{\text{Ctrl, C}} = 49$  cell junctions,  $n_{\text{Ctrl, SubC}} =$   
725  $27$  cell junctions from 2 independent experiments,  $n_{\text{Erlotinib, C}} = 62$  cell junctions,  $n_{\text{Erlotinib, SubC}} =$   
726  $39$  cell junctions from 2 independent experiments. Ordinary one-way ANOVA Tukey's test.

727 **g.** Proposed model of E-cadherin-dependent phosphorylation of EGFR reducing junction  
728 viscosity through the regulation of Rac1, WAVE2, Arp2/3, fine-tuning actin dynamics, with  
729 minimal impact on cortical tension.

730 **h-i.** Experimental schematics and characteristic images of fluorescence recovery after  
731 photobleaching (FRAP) (left) and laser ablation (right) experiments on intercellular junctions  
732 between GFP-Actin-MDCK cells, Scale Bar: 3  $\mu\text{m}$ . Quantification of fluorescence recovery time  
733 (left) and recoil velocities (right) under control and pEGFR-inhibited conditions. FRAP:  $n_{\text{Ctrl}} =$   
734  $36$  cell junctions,  $n_{\text{Erlotinib}} = 15$  cell junctions from 3 independent experiments, two-tailed  
735 unpaired t-test,  $p<0.0001$ ; Laser ablation:  $n_{\text{Ctrl}} = 10$  cell junctions,  $n_{\text{Erlotinib}} = 7$  cell junctions  
736 from 2 independent experiments, two-tailed unpaired t-test,  $p=0.8983$ .

737

738

**a** Cell migration experiments

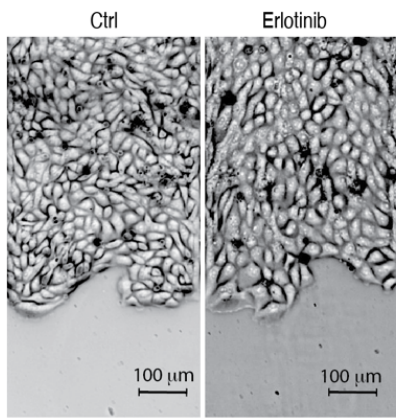

**b**

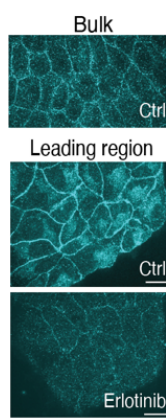

**c**

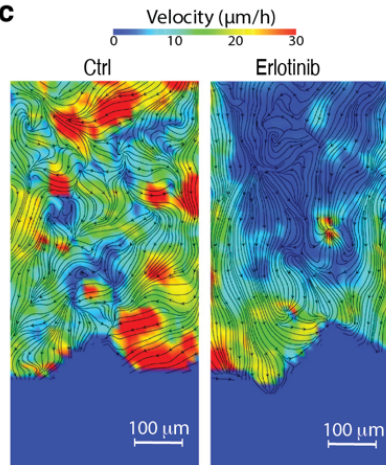

**d**

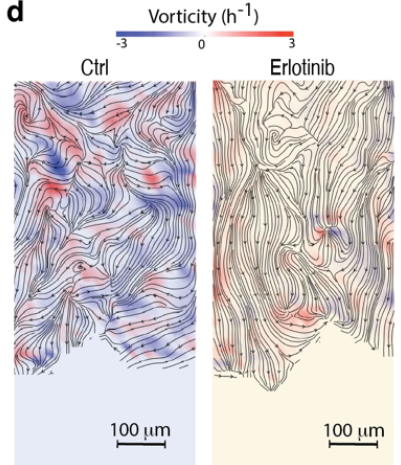

**e**

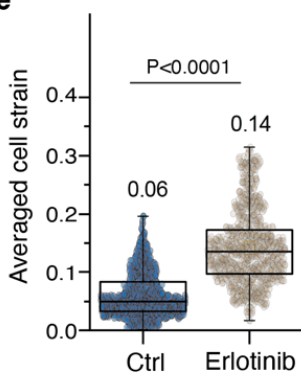

**f**

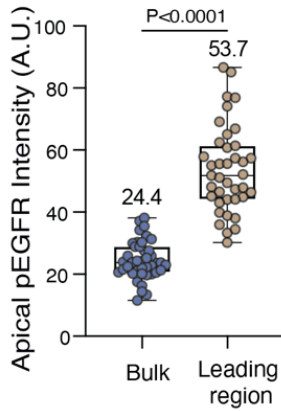

**g**

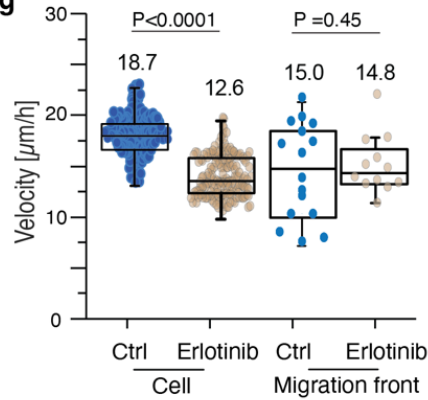

**h**

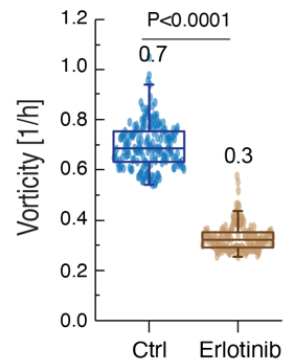

**i** Measurement of the dissipative cell relaxation time

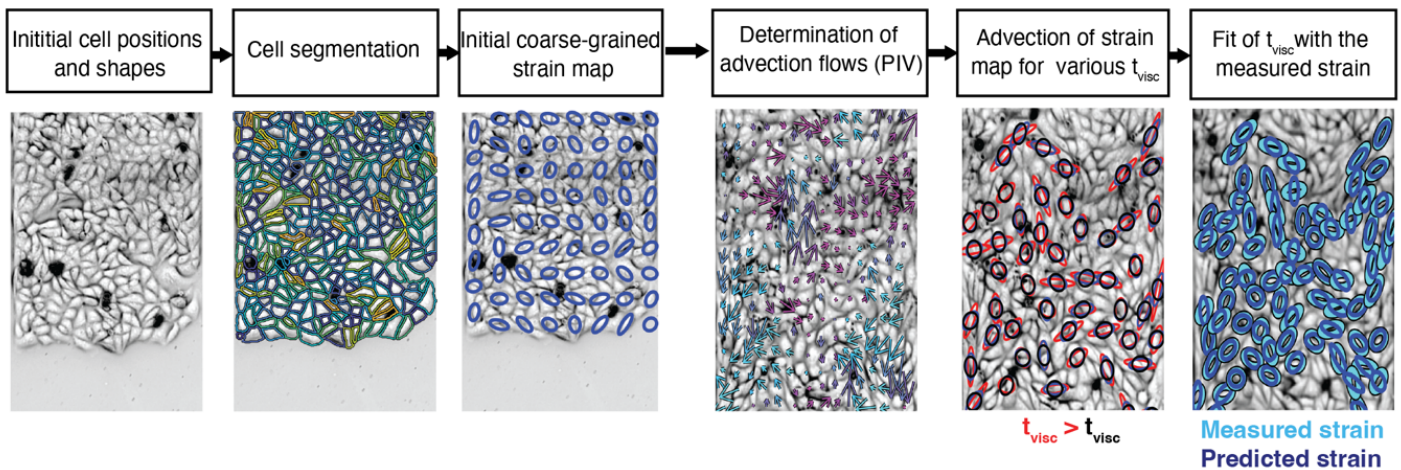

**j**

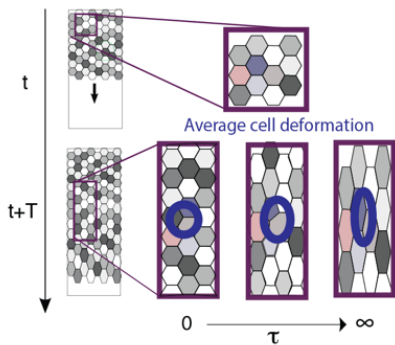

**k**

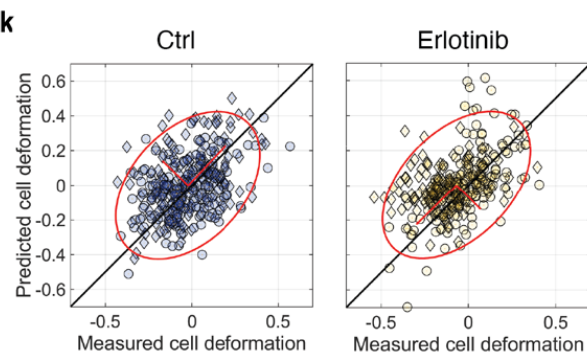

**l**

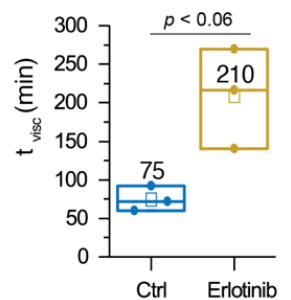

740  
741  
742  
743  
744  
745  
746  
747  
748  
749  
750  
751  
752  
753  
754  
755  
756  
757  
758  
759  
760  
761  
762  
763  
764  
765  
766  
767  
768  
769  
770  
771  
772  
773  
774  
775  
776

**Fig. 3: Phosphorylated EGFR (pEGFR) modulates cell deformability and influences collective migration.**

**a.** Phase-contrast images of MDCK monolayers migrating on fibronectin-coated line patterns under control and pEGFR-inhibited conditions (Erlotinib at 1  $\mu$ M). Scale Bar: 100  $\mu$ m. Five independent experiments yielded consistent results.

**b.** Immunostaining of apical pEGFR(Y845) highlights its localization at cell junctions in bulk and leading regions under control and leading regions under pEGFR-inhibited conditions. Scale Bar: 20  $\mu$ m. Four independent experiments corroborate these findings.

**c-d.** Representative velocity (**c**) and vorticity (**d**) profiles with flow line maps, illustrate MDCK monolayer migration under control and pEGFR-inhibited conditions. Scale bar: 100  $\mu$ m. Three independent experiments yielded consistent results.

**e.** Quantification of cellular strain states in the monolayer under control and pEGFR-inhibited conditions.  $n_{\text{Ctrl}} = 1060$  cells and  $n_{\text{Erlotinib}} = 1060$  cells from 3 independent experiments, two-tailed unpaired t-test,  $p < 0.0001$ .

**f.** Quantification of apical localization of pEGFR (Y845) at the bulk and leading front region of the monolayer.  $n_{\text{Bulk}} = 42$  cell junctions and  $n_{\text{leading}} = 39$  cell junctions from 3 independent experiments, two-tailed unpaired t-test,  $p < 0.0001$ .

**g.** Quantification of cell velocity (left) and migration front velocity (right) under control and pEGFR-inhibited conditions.  $n_{\text{ctrl, cell}} = 181$  cells,  $n_{\text{Erlotinib, cell}} = 181$  cells from 3 independent experiments,  $p < 0.0001$ ;  $n_{\text{ctrl, migration front}} = 16$  strips,  $n_{\text{Erlotinib, migration front}} = 12$  strips from 3 independent experiments,  $p = 0.45$ , two-tailed unpaired t-test.

**h.** Quantification of spatial correlation in the velocity field under control and pEGFR-inhibited conditions.  $n_{\text{ctrl}} = 181$  cells,  $n_{\text{Erlotinib}} = 181$  cells from 3 independent experiments, two-tailed unpaired t-test,  $p < 0.0001$ .

**i.** Schematic representation of the analysis pipeline to measure the average cell shape relaxation time in a migrating monolayer. Average cell strain profiles along the migration axis are depicted, with bold lines indicating mean values and narrow lines representing standard deviations.

**j-k.** Correlative plots between measured and advection-based predicted cellular strain for the best fit of the viscoelastic time ( $t_{\text{visc}}$ ) under control and pEGFR-inhibited conditions. Two independent experiments yielded consistent results.

**l.** Measured viscoelastic time ( $t_{\text{visc}}$ ) under control and pEGFR-inhibited conditions.  $n_{\text{ctrl}} = 3$  strips,  $n_{\text{Erlotinib}} = 3$  strips from 2 independent experiments, two-tailed unpaired t-test,  $p < 0.06$ .



**a** RUSH-EGFR simulations

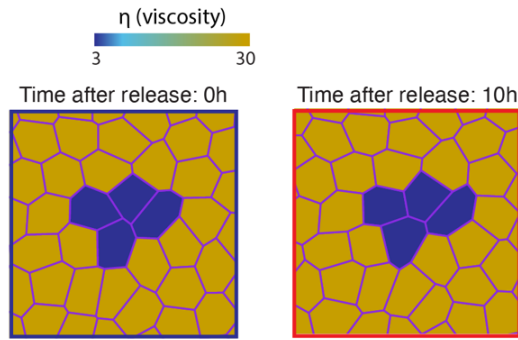

**b**

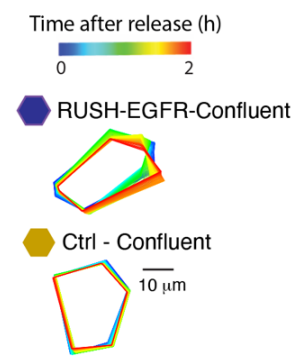

**c**

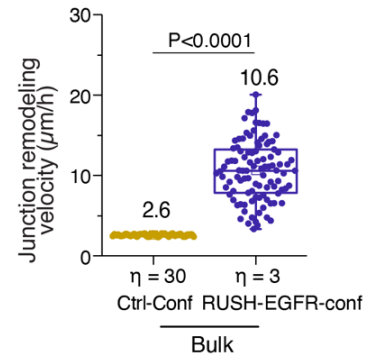

**d** Cell migration simulations

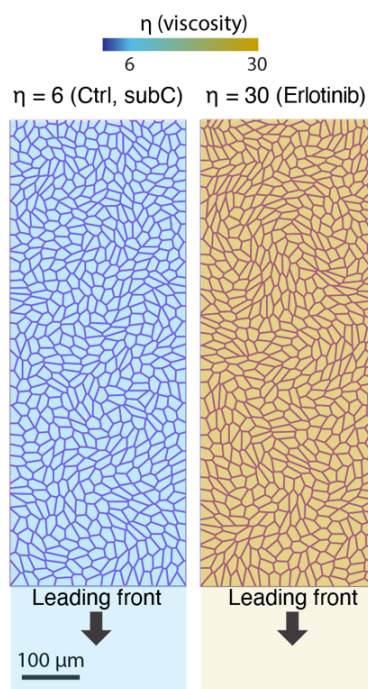

**e**

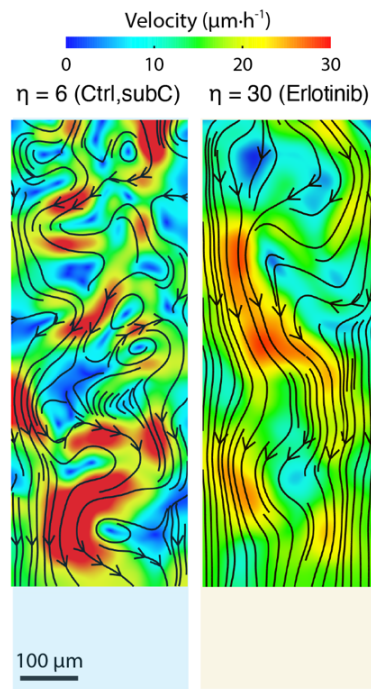

**f**

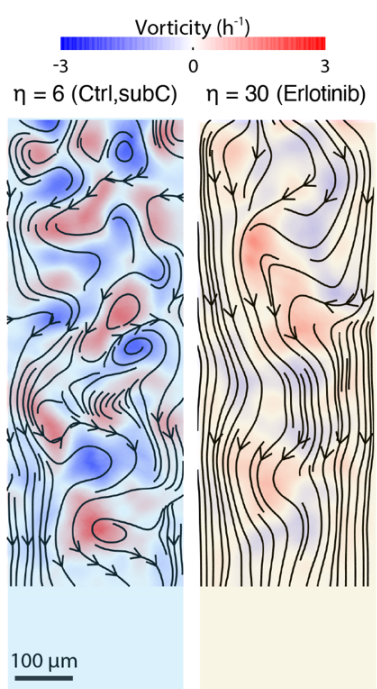

**g**

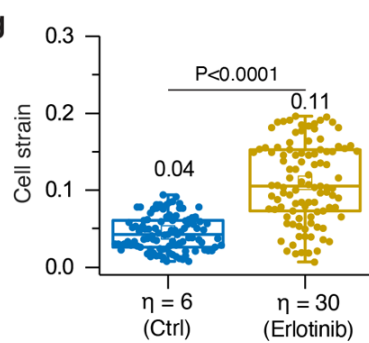

**h**

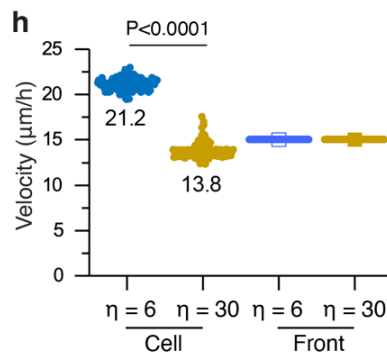

**i**

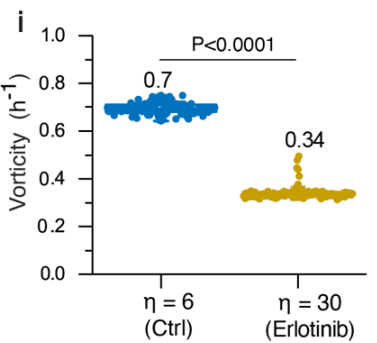

**j**

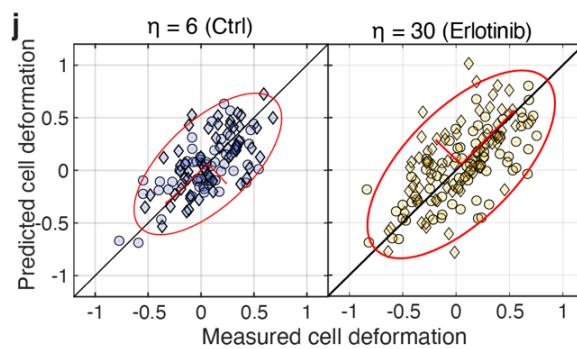

**k**

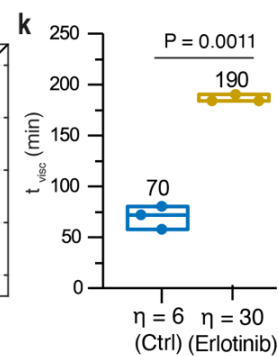

**l**

|                              | Ctrl subC |           | Erlotinib |            |
|------------------------------|-----------|-----------|-----------|------------|
|                              | Exp       | Simul η=6 | Exp       | Simul η=30 |
| Cell Strain (%)              | 5         | 4         | 10        | 11         |
| Velocity (μm/h)              | 18        | 21        | 13        | 14         |
| Vorticity (h <sup>-1</sup> ) | 0.9       | 0.7       | 0.3       | 0.3        |
| Corr Length (μm)             | 110       | 80        | 200       | 150        |
| t <sub>visc</sub> (min)      | 75        | 70        | 210       | 190        |

778

779 **Fig. 4: Modeling the impact of viscosity changes on epithelial migration.**

780 **a.** Simulated cellular arrangement in a vertex model with tension fluctuation, illustrating four  
781 low viscosity cells (dark blue,  $\eta=3$ ) within a larger population of normal viscosity cells (orange,  
782  $\eta=30$ ). This models RUSH-EGFR activated cells within a large tissue of inactivated cells.

783 **b.** Temporal variation of two representative cell profiles for low viscosity (RUSH-EGFR) cells  
784 (top) and control cells (bottom).

785 **c.** Quantifications of the cell-cell junction remodeling velocity for control cells and low  
786 viscosity (RUSH-EGFR) cells ( $\eta=30$  or  $\eta=3$ , respectively). Conf = Confluent.  $n_{\text{Ctrl}} = 101$  cell  
787 junctions and  $n_{\text{RUSH-EGFR}} = 101$  cell junctions from simulations, two-tailed unpaired t-test,  
788  $p < 0.0001$ .

789 **d.** Simulated cellular arrangement in a vertex model with  $\eta=6$  (light blue) and  $\eta=30$  (orange),  
790 modelling the control and pEGFR-inhibited (Erlotinib) tissues, in the presence of cellular  
791 activity and an imposed uniform front migration speed.

792 **e-f.** Velocity (**e**) and, vorticity fields (**f**), both with flow lines (black) for the model of control  
793 and pEGFR-inhibited conditions.

794 **g-i.** Distribution in the simulated averaged cellular strain (**g**), velocity (displayed together with  
795 the imposed front migration speed) (**h**), and vorticity (**i**), under control and pEGFR-inhibited  
796 conditions (see **Methods** for averaging procedure).  $n_{\text{Ctrl, strain}} = 101$  cells and  $n_{\text{Erlotinib, strain}} = 101$   
797 cells from simulations, two-tailed unpaired t-test,  $p < 0.0001$ .  $n_{\text{Ctrl, velocity}} = 100$  cells and  $n_{\text{Erlotinib, velocity}} = 100$  cells from simulations, two-tailed unpaired t-test,  $p < 0.0001$ .  $n_{\text{Ctrl, vorticity}} = 100$  cells  
799 and  $n_{\text{Erlotinib, vorticity}} = 100$  cells from simulations, two-tailed unpaired t-test,  $p < 0.0001$ .

800 **j.** Correlative plots between the measured and advection-based predicted cellular strain for  
801 the best fit of the viscoelastic time ( $t_{\text{visc}}$ ) under control ( $\eta=6$ ) and pEGFR-inhibited ( $\eta=30$ )  
802 conditions.

803 **k.** Viscoelastic time ( $t_{\text{visc}}$ ) for control ( $\eta=6$ ) and pEGFR-inhibited ( $\eta=30$ ).  $n_{\text{Ctrl}} = 3$  strips and  
804  $n_{\text{Erlotinib}} = 3$  strips from simulations, two-tailed unpaired t-test,  $p = 0.0011$ .

805 **l.** Table summarizing the experimental and simulation results.

806

807

808 **Extended Data Figures**

809

810

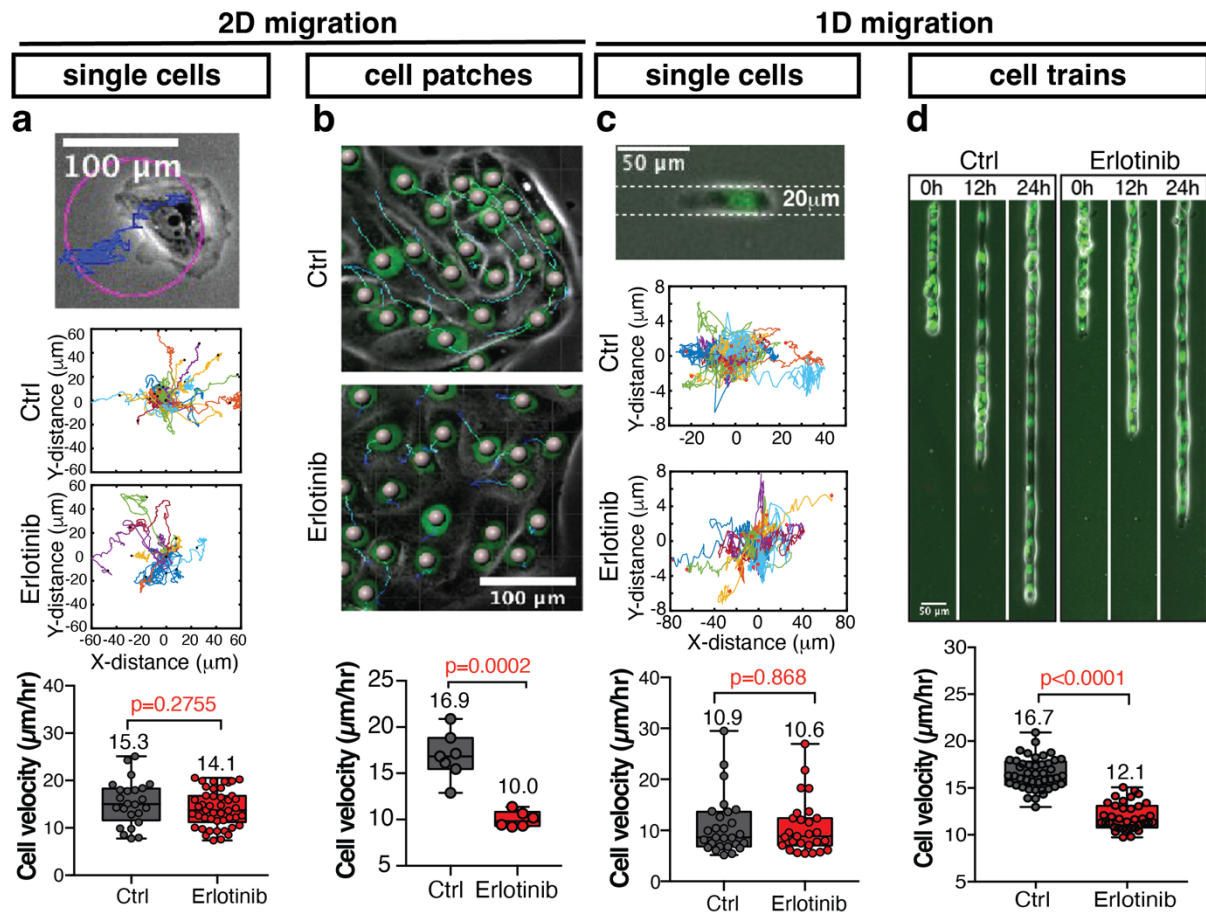

811

812

813

814 **Extended Data Fig. 1: Dephosphorylation of EGFR reduces the dynamics of cell junction**  
815 **deformation without directly altering cell-substrate interactions.**

816 **a.** Inhibition of EGFR activity does not disrupt single-cell motility in 2D migration.  
817 Representative examples of single-cell 2D migration on fibronectin-coated surfaces (top),  
818 Scale Bar: 100  $\mu\text{m}$ . Thirty to forty representative nuclear tracks over 12h in cells randomly  
819 migrating under Ctrl and pEGFR inhibition conditions (middle). Average speed of single-cell  
820 motility from nuclear movement tracks over 12h under Ctrl and pEGFR inhibition conditions  
821 (bottom),  $n_{\text{Ctrl}} = 24$  cells and  $n_{\text{Erlotinib}} = 46$  cells from 3 independent experiments, two-tailed  
822 unpaired t-test,  $p=0.2755$ .

823 **b.** Representative examples of migration of 2D epithelial patches on fibronectin-coated  
824 surfaces under Ctrl and pEGFR inhibition conditions (top), Scale Bar: 100  $\mu\text{m}$ . Average speed  
825 of cells in patch migration for 12h from nuclear movement tracks under Ctrl and pEGFR  
826 inhibition conditions,  $n_{\text{Ctrl}} = 7$  cell patches and  $n_{\text{Erlotinib}} = 6$  cell patches from 4 different  
827 experiments, two-tailed unpaired t-test,  $p=0.0002$ .

828 **c.** Inhibition of EGFR activity does not disturb single-cell motility in 1D migration.  
829 Representative examples of single-cell migration on 20  $\mu\text{m}$  fibronectin-coated lines (top),  
830 Scale Bar: 50  $\mu\text{m}$ . Thirty representative nuclear tracks over 12h in cells migrating on 20  $\mu\text{m}$   
831 line patterns under Ctrl and pEGFR inhibition conditions (middle). Average speed of single-  
832 cell motility on 20  $\mu\text{m}$  line patterns from nuclear movement tracks under Ctrl and pEGFR  
833 inhibition conditions (bottom),  $n_{\text{Ctrl}} = 27$  cells and  $n_{\text{Erlotinib}} = 27$  cells from 3 different  
834 experiments, two-tailed unpaired t-test,  $p=0.868$ .

835 **d.** Representative examples of migration of 1D epithelial trains on 20  $\mu\text{m}$  fibronectin-coated  
836 lines under Ctrl and pEGFR inhibition conditions (top), Scale Bar: 50  $\mu\text{m}$ . Average speed of  
837 cells in train migration for 24h on 20  $\mu\text{m}$  line patterns from nuclear movement tracks under  
838 Ctrl and pEGFR inhibition conditions,  $n_{\text{Ctrl}} = 44$  cell trains and  $n_{\text{Erlotinib}} = 36$  cell trains from 3  
839 different experiments, two-tailed unpaired t-test,  $p<0.0001$ .

840

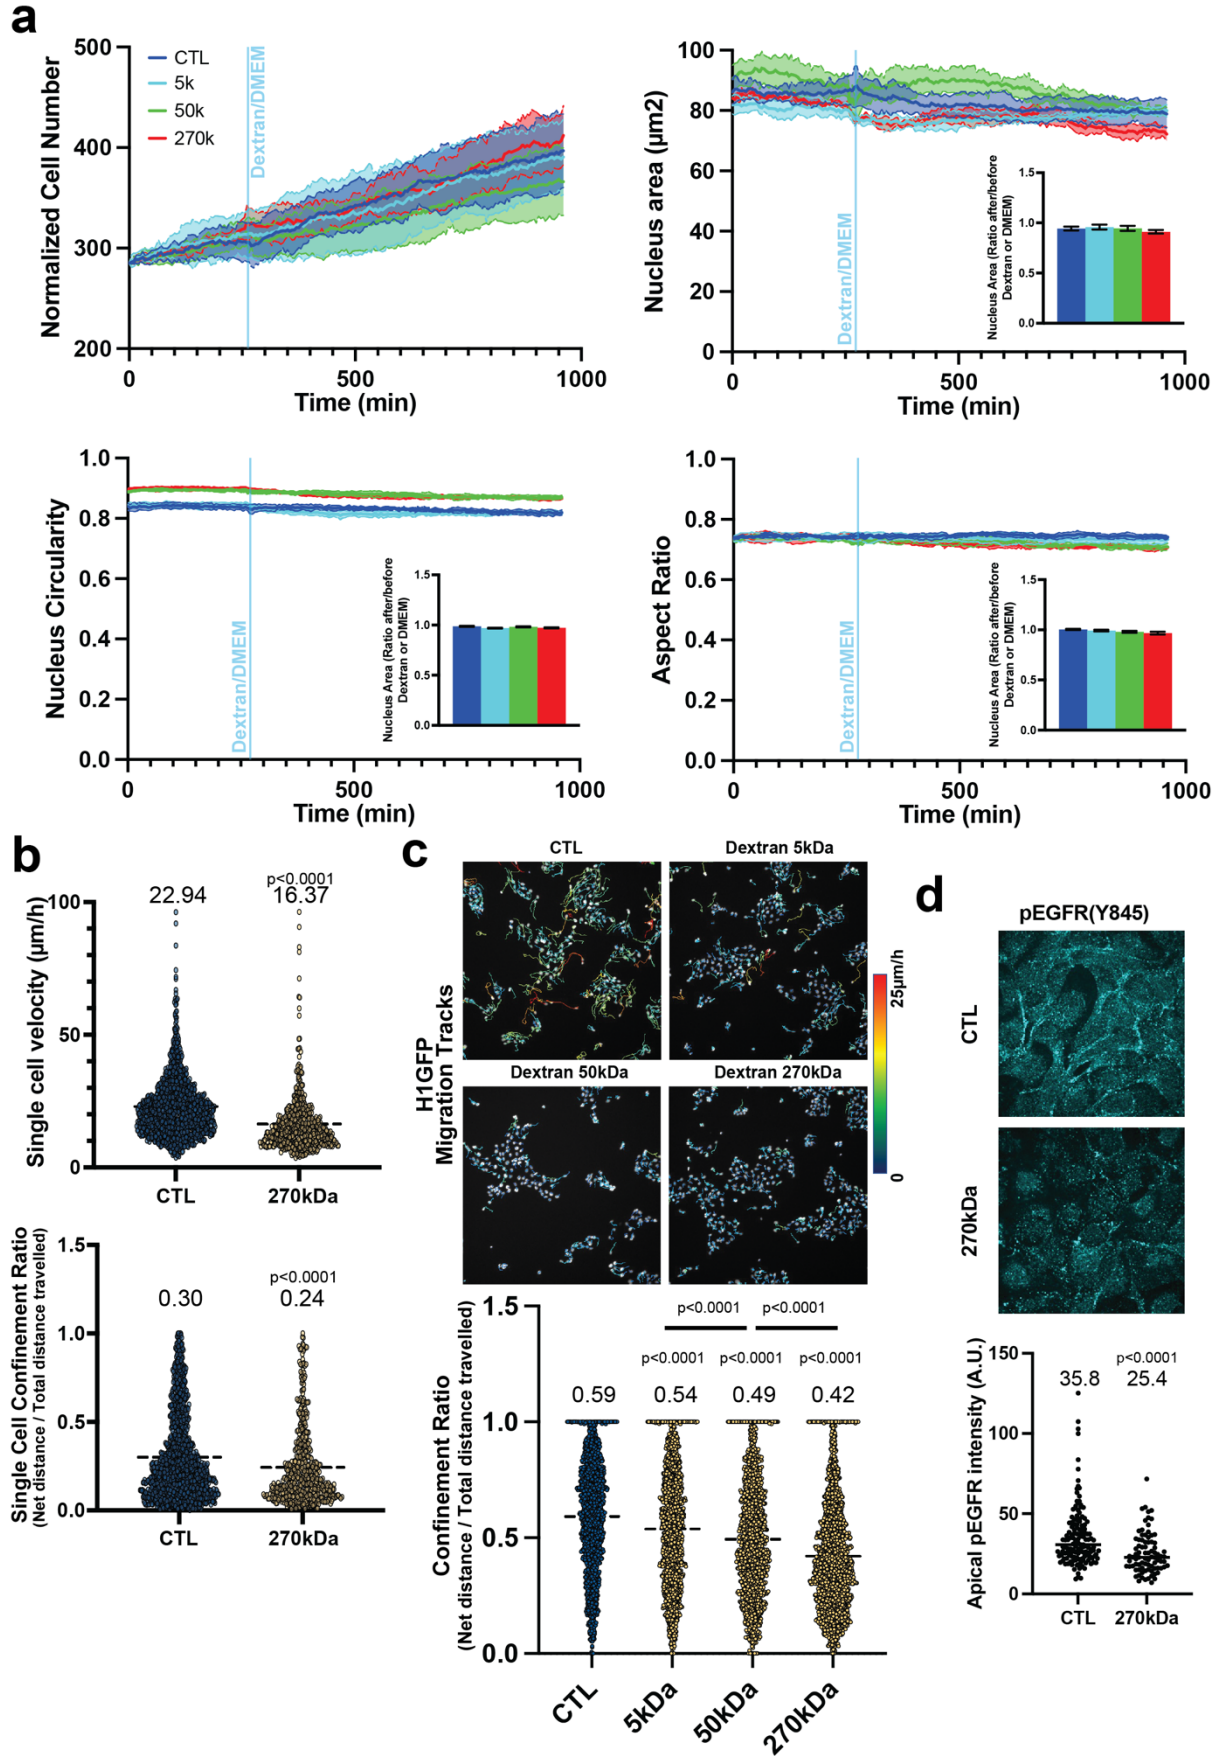

843 **Extended Data Fig. 2: Dextran impact on single and collective cell migration speed and mode**  
844 **without evident signs of osmotic shock.**

845 **a.** Quantification of cell proliferation (upper left), nucleus area (upper right), circularity (lower  
846 left) and aspect ratio (lower right) on cell patches before and after the addition of dextran of  
847 the indicated molecular weight. The light blue line indicates the moment of dextran addition.

848 Four independent experiments yielded consistent results.

849 **b.** Quantification of single-cells velocity and persistence before and after the addition of  
850 270kDa dextran,  $n_{\text{Ctrl}} = 1217$  cells and  $n_{270\text{kDa}} = 543$  cells from 3 different experiments, two-  
851 tailed unpaired t-test,  $p < 0.0001$ .

852 **c.** Representative images of cell tracking with or without the presence of dextran of the  
853 indicated molecular weight (up). Quantification of individual cell persistence within cell  
854 patches under control or indicated molecular weight dextran conditions (down),  $n_{\text{Ctrl}} = 1762$   
855 cells,  $n_{5\text{kDa}} = 1770$  cells,  $n_{50\text{kDa}} = 1424$  cells and  $n_{270\text{kDa}} = 1968$  cells from 3 different  
856 experiments, Ordinary one-way ANOVA Tukey's test,  $p < 0.0001$ .

857 **d.** Confocal images (up) and quantification (down) of pEGFR(Y845) junctional fluorescence  
858 intensities under control and 270kDa dextran conditions,  $n_{\text{Ctrl}} = 143$  cell junctions and  $n_{270\text{kDa}}$   
859 = 84 cell junctions from 3 different experiments, two-tailed unpaired t-test,  $p < 0.0001$ .

860

861

862

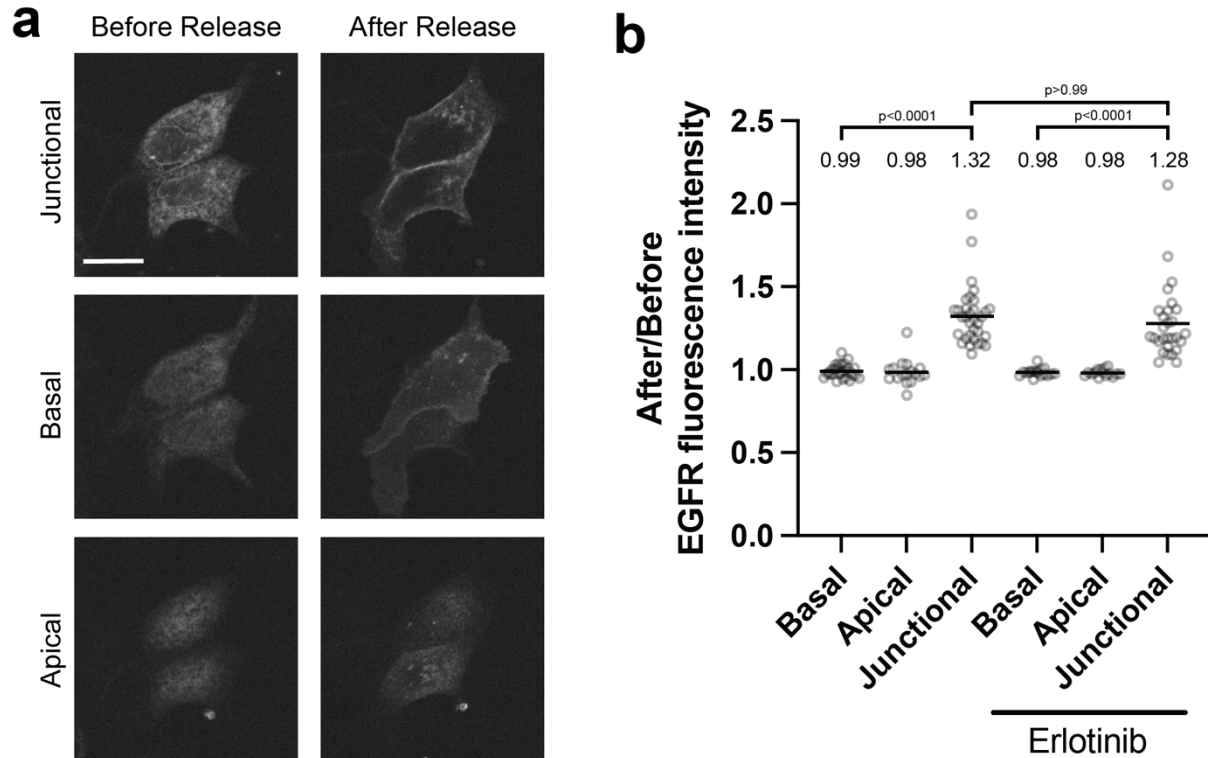

863

864

**Extended Data Fig. 3: EGFR preferentially translocates to cell-cell junction after release from the Endoplasmic Reticulum (ER).**

865

866

**a-b.** Confocal images (**a**) and corresponding quantification (**b**) of EGFR-GFP fluorescence

867

intensities at the junctional, basal and apical side of the cells, both before and after release

868

from the endoplasmic reticulum. Scale Bar: 20  $\mu$ m.  $n_{\text{Ctrl Basal}} = 27$  cells,  $n_{\text{Ctrl Apical}} = 17$  cells,  $n_{\text{Ctrl}}$

869

$n_{\text{Junctional}} = 33$  cell junctions,  $n_{\text{Erlotinib Basal}} = 17$  cells,  $n_{\text{Erlotinib Apical}} = 15$  cells and  $n_{\text{Erlotinib Junctional}} = 28$

870

cell junctions from 3 different experiments, Ordinary one-way ANOVA Tukey's test.

871

872

873

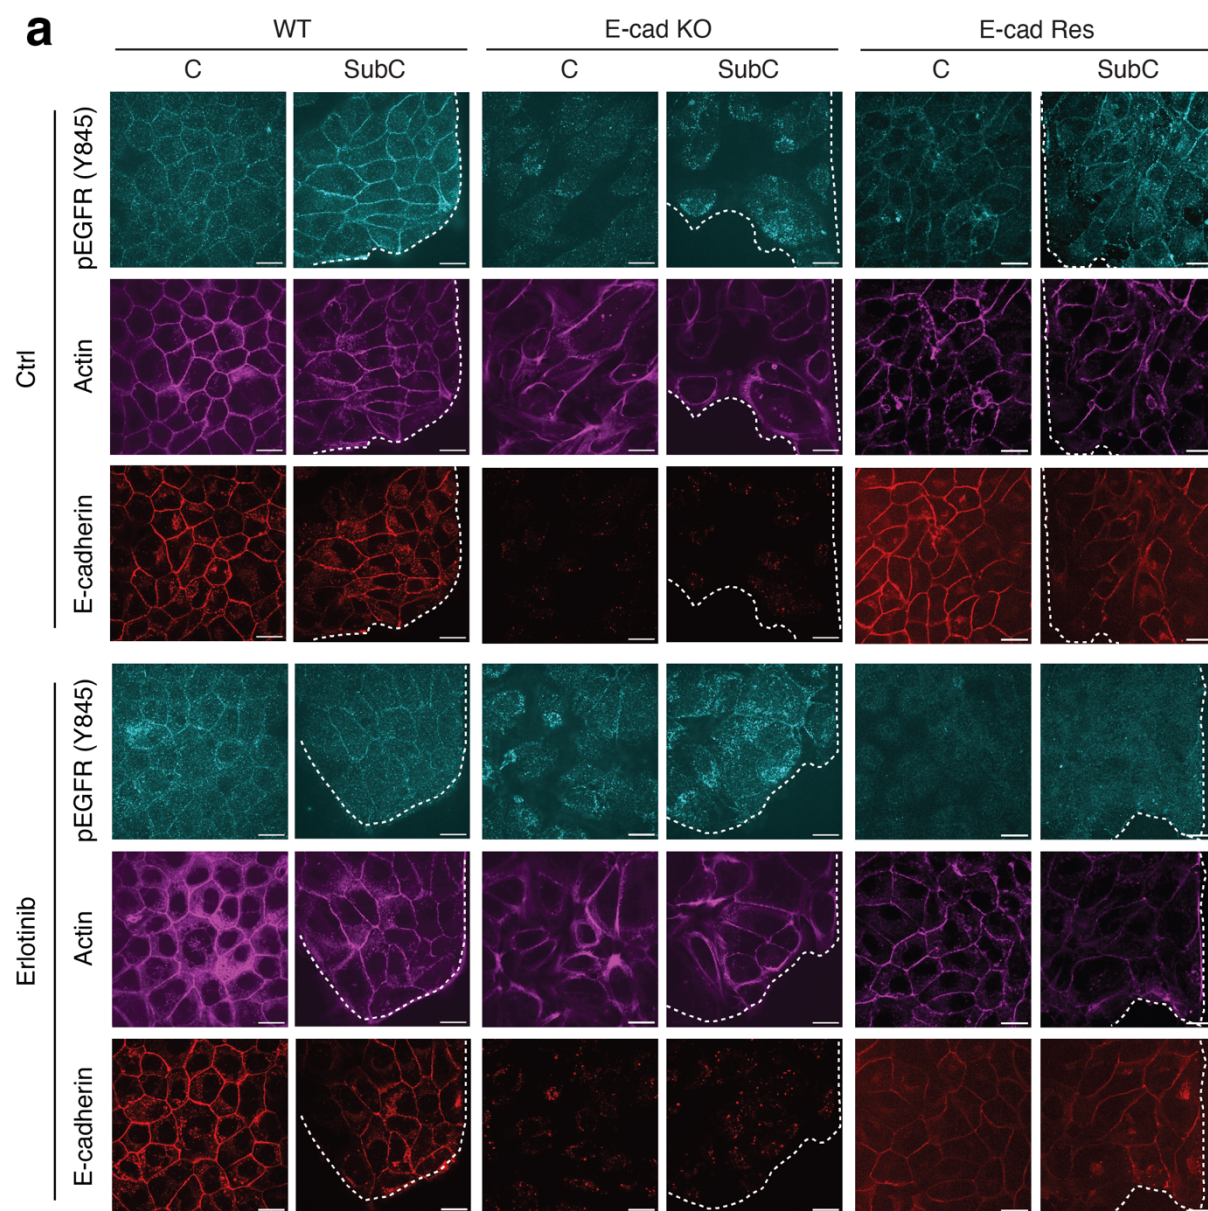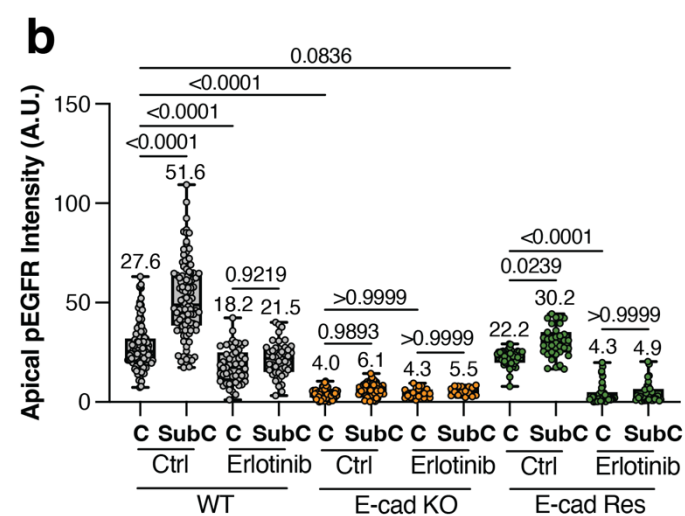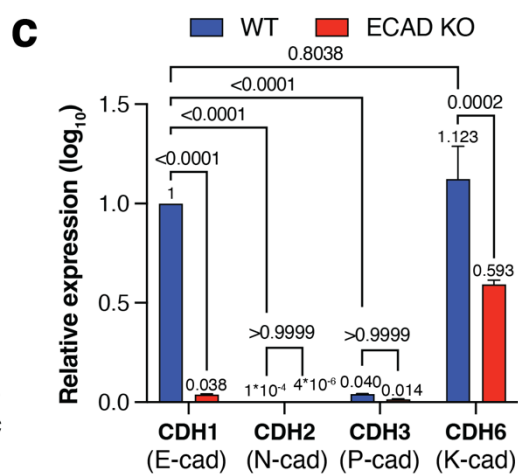



876 **Extended Data Fig. 4: E-cadherin junctions govern phosphorylation of EGFR (Y845) at the**  
877 **apical side of MDCK tissues.**

878 **a.** Immunostaining of pEGFR (Y845), actin and E-cadherin in wild-type (WT), E-cadherin knock-  
879 out (Ecad-KO) and Ecad-KO-rescued (Ecad-Res) MDCK cells on the apical side of confluent (C,  
880 left) and sub-confluent (SubC, right) regions under control and pEGFR inhibition (Erlotinib)  
881 conditions. The white dotted line indicates the leading front of the patches. Scalr Bar: 20  $\mu$ m.  
882 **b.** Quantification of apical pEGFR in WT, Ecad-KO and Ecad-Res MDCK cells. For WT:  $n_{Ctrl, C} =$   
883 122 cell junctions,  $n_{Ctrl, SubC} = 106$  cell junctions from 4 different experiments,  $n_{Erlotinib, C} = 51$   
884 cell junctions,  $n_{Erlotinib, SubC} = 44$  cell junctions from 3 different experiments; For Ecad-KO:  $n_{Ctrl,$   
885  $C} = 67$  cell junctions,  $n_{Ctrl, SubC} = 61$  cell junctions from 3 different experiments,  $n_{Erlotinib, C} = 24$   
886 cell junctions,  $n_{Erlotinib, SubC} = 16$  cell junctions from 3 different experiments; For Ecad-Res:  $n_{Ctrl,$   
887  $C} = 47$  cell junctions,  $n_{Ctrl, SubC} = 34$  cell junctions from 3 different experiments,  $n_{Erlotinib, C} = 41$   
888 cell junctions,  $n_{Erlotinib, SubC} = 32$  cell junctions from 3 different experiments, Ordinary one-way  
889 ANOVA Tukey's test.

890 **c.** RT-qPCR results showing the relative expression of CDH1 (E-cad), CDH2 (N-cad), CDH3 (P-  
891 cad) and CDH6 (K-cad) in WT and Ecad-KO MDCK cells from 3 different experiments.

892

893

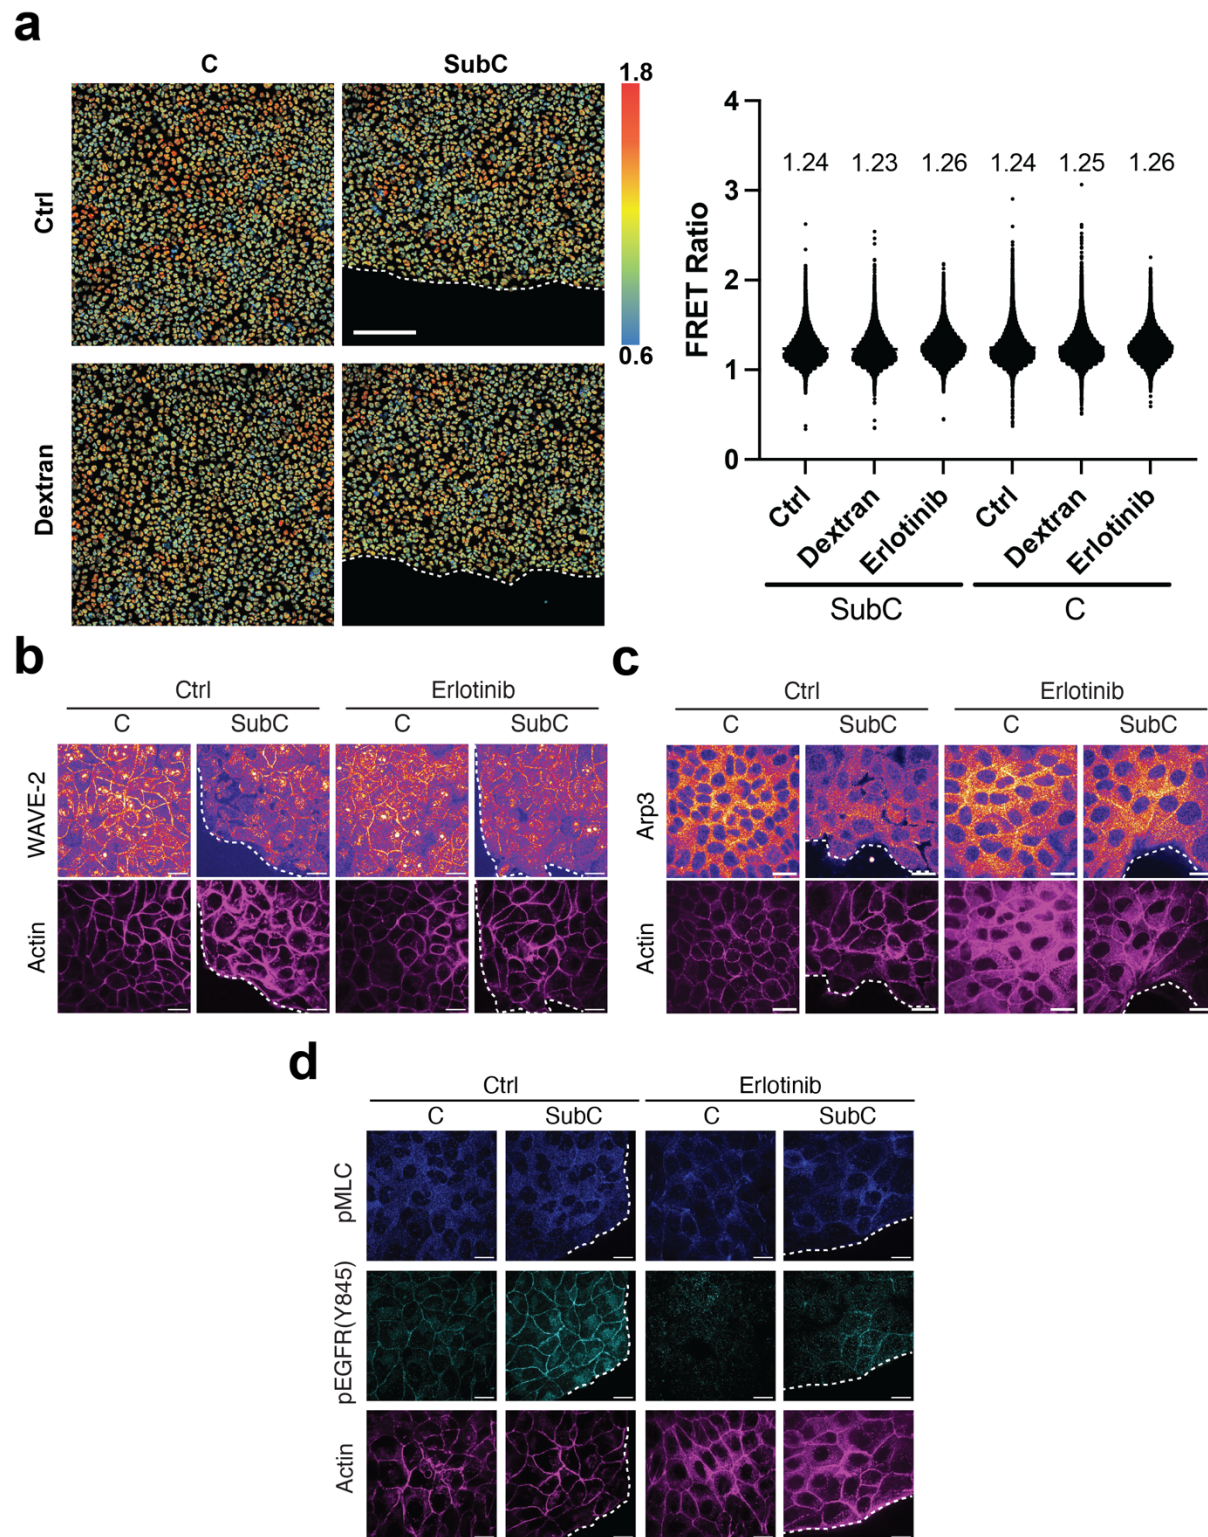

896 **Extended Data Fig. 5: Molecular components underlying EGFR phosphorylation in response**  
897 **to cell junction deformation.**

898 **a.** Representative images and corresponding quantification of FRET Ratio in confluent (C, left)  
899 and sub-confluent (SubC, right) regions of migrating MDCK monolayers, with or without EGFR  
900 inhibition (Erlotinib),  $n_{\text{Ctrl, SubC}} = 27014$  cells,  $n_{\text{Dextran, SubC}} = 27766$  cells,  $n_{\text{Erlotinib, SubC}} = 15316$  cells,  
901  $n_{\text{Ctrl, C}} = 43852$  cells,  $n_{\text{Dextran, C}} = 43079$  cells and  $n_{\text{Erlotinib, C}} = 27305$  cells from 3 independent  
902 experiments. Scale Bar: 200  $\mu\text{m}$ .

903 **b-c.** Immunostaining of WAVE-2 and actin (**b**), Arp3 and actin (**c**) on the apical side of confluent  
904 (C, left) and sub-confluent (SubC, right) regions under Control and pEGFR inhibition (Erlotinib)  
905 conditions. Scale Bar: 20  $\mu\text{m}$ . Two independent experiments yielded consistent results.

906 **d.** Immunostaining of pMLC, pEGFR (Y845) and actin on the apical side of confluent (C, left)  
907 and sub-confluent (SubC, right) regions under control and pEGFR inhibition (Erlotinib)  
908 conditions. Scale Bar: 20  $\mu\text{m}$ . Two independent experiments yielded consistent results.

909

910

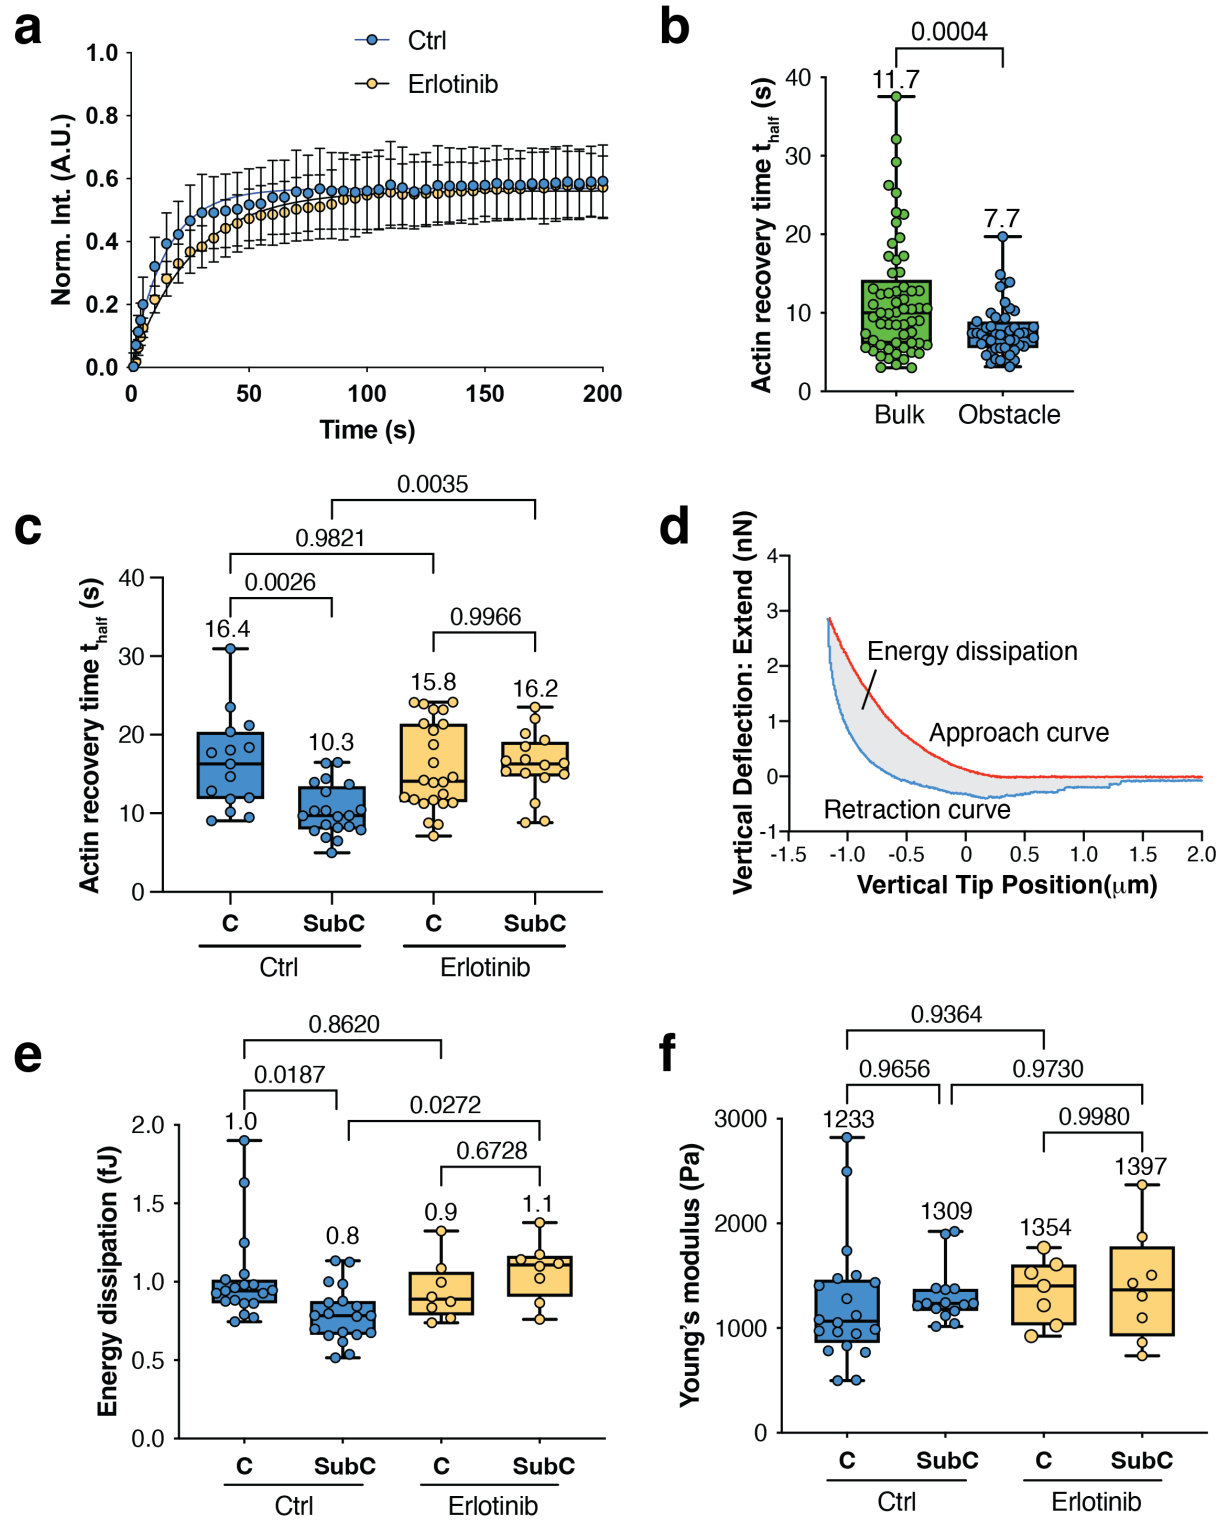

913 **Extended Data Fig. 6: Regulation of actin dynamics and junctional viscoelastic properties by**  
914 **EGFR phosphorylation without impact on junctional tension.**

915 **a.** Fluorescence Recovery After Photobleaching (FRAP) experiments of actin were conducted  
916 at the apical regions of cell-cell junctions under both control and pEGFR inhibition (Erlotinib)  
917 conditions. The data were normalized and fitted with best-fit curves.

918 **b.** Actin dynamics were assessed in cells encircling obstacles and in bulk regions.  $n_{\text{Bulk}} = 61$  cell  
919 junctions and  $n_{\text{Obstacle}} = 47$  cell junctions from 3 independent experiments, two-tailed unpaired  
920 t-test,  $p=0.0004$ .

921 **c.** Measurements of actin dynamics in migrating MDCK monolayers were performed in both  
922 confluent (C, left) and sub-confluent (SubC, right) regions under control and pEGFR inhibition  
923 (Erlotinib) conditions.  $n_{\text{Ctrl, C}} = 15$  cell junctions,  $n_{\text{Ctrl, SubC}} = 20$  cell junctions from 2 independent  
924 experiments,  $n_{\text{Erlotinib, C}} = 24$  cell junctions,  $n_{\text{Erlotinib, SubC}} = 16$  cell junctions from 3 independent  
925 experiments, Ordinary one-way ANOVA Tukey's test.

926 **d.** Typical force-displacement curves from Atomic Force Microscopy (AFM) force  
927 measurements of MDCK monolayers. The area enclosed between the approach and  
928 retraction curves, corresponds to energy dissipation.

929 **e-f.** Measurements of energy dissipation (**e**) and Young's modulus (**f**) of migrating MDCK  
930 monolayers in confluent (C, left) and sub-confluent (SubC, right) regions under control and  
931 pEGFR inhibition (Erlotinib) conditions. For energy dissipation:  $n_{\text{Ctrl, C}} = 19$  cell junctions,  $n_{\text{Ctrl, SubC}}$   
932  $= 19$  cell junctions from 3 independent experiments,  $n_{\text{Erlotinib, C}} = 8$  cell junctions,  $n_{\text{Erlotinib, SubC}}$   
933  $= 8$  cell junctions from 3 independent experiments, Ordinary one-way ANOVA Tukey's  
934 test. For Young's modulus:  $n_{\text{Ctrl, C}} = 20$  cell junctions,  $n_{\text{Ctrl, SubC}} = 15$  cell junctions from 3  
935 independent experiments,  $n_{\text{Erlotinib, C}} = 7$  cell junctions,  $n_{\text{Erlotinib, SubC}} = 8$  cell junctions from 3  
936 independent experiments, Ordinary one-way ANOVA Tukey's test.

937

938

939

940 **Supplementary Discussion:**

941 **E-Cadherin - EGFR - Rac1 - Wave2 - Arp2/3 interplay and relevance at cell-cell junctions.**

942

943 In this study, we elucidated a molecular signaling pathway that plays a crucial role in  
944 regulating the viscosity of intercellular junctions. Our findings demonstrate that the trans  
945 binding of E-cadherin within highly dynamic cell-cell junctions triggers the activation of EGFR  
946 and Rac1, aligning with previous research<sup>7, 31-33</sup>. Rac1 has been well-established to play a  
947 major role in Wave2 complex recruitment and activation<sup>34</sup>. Specifically, E-cadherins activate  
948 Rac1 at the cell-cell junction, contributing to junction stabilization through Wave2<sup>35, 36</sup>.

949

950 Contrary to existing studies conducted on highly confluent monolayers characterized by  
951 mature contacts and non-dynamic cell-cell junctions, our investigation focuses on sub-  
952 confluent patches exhibiting elevated apical pEGFR and Rac1-GTP levels. In our unique  
953 context of high dynamics, we proposed that the signaling pathways and molecular actors may  
954 differ. Notably, Rac1 activation, which has been linked to E-cadherin adhesion disruptions<sup>37</sup>,  
955 could potentially contribute to the rapid turnover of E-cadherin adhesions in highly dynamic  
956 cell-cell junctions, thereby hindering Wave2 recruitment for junction stabilization.

957

958 Alternatively, we hypothesize that the impact of pEGFR at the junction is non-local, coupling  
959 with recruitment at the basal part of cells and creating competition with the junctional pool.  
960 Unfortunately, due to limitations in the available imaging techniques, we were unable to  
961 discern the cortex bound to the cytoplasmic fraction. Consequently, while our paper  
962 establishes a correlation between the recruitment levels of various proteins, we refrain from  
963 asserting a direct causal link.

964

965 **Captions of the Supplementary videos.**

966

967 **Supplementary Video 1:**

968 Cell-cell reorganization in representative patches of MDCK-H1-GFP cells under control and  
969 pEGFR-inhibited (Erlotinib at 1 $\mu$ M) conditions recorded at 12 frames/hour. Scale Bar: 100 $\mu$ m.

970

971 **Supplementary Video 2:**

972 Cell patches migration of MDCK-H1-GFP cells with or without dextran addition recorded at 12  
973 frames/hour. Scale Bar: 100 $\mu$ m.

974

975 **Supplementary Video 3:**

976 MDCK-WT monolayers with mosaic expression of RUSH-EGFR-GFP. Junction elongation  
977 before and after addition of biotin and subsequent release of EGFR from the endoplasmic  
978 reticulum under control and pEGFR-inhibited (Erlotinib at 1 $\mu$ M) conditions recorded at 12  
979 frames/hour. Scale Bar: 20 $\mu$ m.

980

981 **Supplementary Video 4:**

982 Cells encircling obstacles and in bulk regions under control and pEGFR-inhibited (Erlotinib at  
983 1 $\mu$ M) conditions recorded at 15 frames/hour. Scale Bar: 50 $\mu$ m.

984

985 **Supplementary Video 5:**

986 Cells migrating on 400  $\mu$ m width line strips under control and pEGFR-inhibited (Erlotinib at  
987 1 $\mu$ M) conditions recorded at 15 frames/hour. Scale Bar: 100 $\mu$ m.

988

989 **Supplementary Video 6:**

990 The vorticity of the collective flow for the migrating cells under control and pEGFR-inhibited  
991 (Erlotinib at 1 $\mu$ M) conditions recorded at 15 frames/hour.

992

993 **Supplementary Video 7:**

994 Vertex-model simulations under control ( $\eta=6$ ) and pEGFR-inhibited (Erlotinib at 1 $\mu$ M) ( $\eta=30$ )  
995 conditions. Other parameters see Supplementary Table II.

996

997

998
